# Supplementary material for: Saccharomyces cerevisiae mitochondria are required for optimal attractiveness to Drosophila melanogaster
Source: PLoS One. 2014 Dec 2;9(12):e113899. doi: 10.1371/journal.pone.0113899 (PMC4252075; doi:10.1371/journal.pone.0113899)
Supplement: S1 Data — Raw data from behavior experiments. (XLSX) [file pone.0113899.s001.xlsx]

## Sheet: Parentals 
Date Counted	Trial	Media	Yeast	Fly Line	1 day old date(of youngest)	# of flies	Female	Male	Total	Total Caught	Percentage Caught	Percetage Female	Percentage Male	Percentage Flies Trapped	Trap Orientation	Near Light
2013-01-11	1	5%Glu YPD	BY4741aux	Ral 437	2013-01-07	145	21	15	36	116	0.310345	0.583333	0.416667	0.8	1	N/A
2013-01-11	1	5%Glu YPD	BY4741aux	Ral 437	2013-01-07	145	16	30	46	116	0.396552	0.347826	0.652174	0.8	1	N/A
2013-01-11	1	5%Glu YPD	BY4742aux	Ral 437	2013-01-07	145	9	6	15	116	0.12931	0.6	0.4	0.8	1	N/A
2013-01-11	1	5%Glu YPD	BY4742aux	Ral 437	2013-01-07	145	9	10	19	116	0.163793	0.473684	0.526316	0.8	1	N/A
2013-01-16	2	5%Glu YPD	BY4741prot	Ral 437	2013-01-08	140	27	7	34	137	0.248175	0.794118	0.205882	0.978571	1	N/A
2013-01-16	2	5%Glu YPD	BY4741prot	Ral 437	2013-01-08	140	19	12	31	137	0.226277	0.612903	0.387097	0.978571	1	N/A
2013-01-16	2	5%Glu YPD	BY4742prot	Ral 437	2013-01-08	140	19	21	40	137	0.291971	0.475	0.525	0.978571	1	N/A
2013-01-16	2	5%Glu YPD	BY4742prot	Ral 437	2013-01-08	140	13	19	32	137	0.233577	0.40625	0.59375	0.978571	1	N/A
2013-01-17	1	5%Glu YPD	BY4741aux	Ral 437	2013-01-09	182	24	31	55	154	0.357143	0.436364	0.563636	0.846154	1	N/A
2013-01-17	1	5%Glu YPD	BY4741aux	Ral 437	2013-01-09	182	25	34	59	154	0.383117	0.423729	0.576271	0.846154	1	N/A
2013-01-17	1	5%Glu YPD	BY4742aux	Ral 437	2013-01-09	182	6	10	16	154	0.103896	0.375	0.625	0.846154	1	N/A
2013-01-17	1	5%Glu YPD	BY4742aux	Ral 437	2013-01-09	182	12	12	24	154	0.155844	0.5	0.5	0.846154	1	N/A
2013-01-17	2	5%Glu YPD	BY4741prot	Ral 437	2013-01-09	143	28	6	34	131	0.259542	0.823529	0.176471	0.916084	1	N/A
2013-01-17	2	5%Glu YPD	BY4741prot	Ral 437	2013-01-09	143	22	12	34	131	0.259542	0.647059	0.352941	0.916084	1	N/A
2013-01-17	2	5%Glu YPD	BY4742prot	Ral 437	2013-01-09	143	18	18	36	131	0.274809	0.5	0.5	0.916084	1	N/A
2013-01-17	2	5%Glu YPD	BY4742prot	Ral 437	2013-01-09	143	9	18	27	131	0.206107	0.333333	0.666667	0.916084	1	N/A
2013-01-18	1	5%Glu YPD	BY4741prot	Ral 437	2013-01-10	120	17	28	45	119	0.378151	0.377778	0.622222	0.991667	1	N/A
2013-01-18	1	5%Glu YPD	BY4741prot	Ral 437	2013-01-10	120	18	17	35	119	0.294118	0.514286	0.485714	0.991667	1	N/A
2013-01-18	1	5%Glu YPD	BY4742prot	Ral 437	2013-01-10	120	13	7	20	119	0.168067	0.65	0.35	0.991667	1	N/A
2013-01-18	1	5%Glu YPD	BY4742prot	Ral 437	2013-01-10	120	9	9	18	119	0.151261	0.5	0.5	0.991667	1	N/A
2013-01-23	1	5%Glu YPD	BY4741aux	Ral 437	2013-01-15	105	8	18	26	99	0.262626	0.307692	0.692308	0.942857	1	N/A
2013-01-23	1	5%Glu YPD	BY4741aux	Ral 437	2013-01-15	105	18	21	39	99	0.393939	0.461538	0.538462	0.942857	1	N/A
2013-01-23	1	5%Glu YPD	BY4742aux	Ral 437	2013-01-15	105	5	7	12	99	0.121212	0.416667	0.583333	0.942857	1	N/A
2013-01-23	1	5%Glu YPD	BY4742aux	Ral 437	2013-01-15	105	1	11	12	99	0.121212	0.0833333	0.916667	0.942857	1	N/A
2013-01-23	2	5%Glu YPD	BY4741aux	Ral 437	2013-01-17	100	12	13	25	72	0.347222	0.48	0.52	0.72	1	N/A
2013-01-23	2	5%Glu YPD	BY4741aux	Ral 437	2013-01-17	100	7	14	21	72	0.291667	0.333333	0.666667	0.72	1	N/A
2013-01-23	2	5%Glu YPD	BY4742aux	Ral 437	2013-01-17	100	8	7	15	72	0.208333	0.533333	0.466667	0.72	1	N/A
2013-01-23	2	5%Glu YPD	BY4742aux	Ral 437	2013-01-17	100	2	9	11	72	0.152778	0.181818	0.818182	0.72	1	N/A
2013-01-29	1	5%Glu YPD	BY4741aux	Ral 437	2013-01-24	93	21	19	40	93	0.430108	0.525	0.475	1	1	N/A
2013-01-29	1	5%Glu YPD	BY4741aux	Ral 437	2013-01-24	93	11	6	17	93	0.182796	0.647059	0.352941	1	1	N/A
2013-01-29	1	5%Glu YPD	BY4742aux	Ral 437	2013-01-24	93	11	5	16	93	0.172043	0.6875	0.3125	1	1	N/A
2013-01-29	1	5%Glu YPD	BY4742aux	Ral 437	2013-01-24	93	12	8	20	93	0.215054	0.6	0.4	1	1	N/A
2013-01-29	2	5%Glu YPD	BY4741aux	Ral 437	2013-01-24	100	16	16	32	96	0.333333	0.5	0.5	0.96	2	BY4741
2013-01-29	2	5%Glu YPD	BY4741aux	Ral 437	2013-01-24	100	20	14	34	96	0.354167	0.588235	0.411765	0.96	2	BY4741
2013-01-29	2	5%Glu YPD	BY4742aux	Ral 437	2013-01-24	100	8	10	18	96	0.1875	0.444444	0.555556	0.96	2	BY4741
2013-01-29	2	5%Glu YPD	BY4742aux	Ral 437	2013-01-24	100	6	6	12	96	0.125	0.5	0.5	0.96	2	BY4741
2013-01-29	3	5%Glu YPD	BY4741prot	Ral 437	2013-01-24	100	22	25	47	109	0.431193	0.468085	0.531915	1.09	1	N/A
2013-01-29	3	5%Glu YPD	BY4741prot	Ral 437	2013-01-24	100	16	10	26	109	0.238532	0.615385	0.384615	1.09	1	N/A
2013-01-29	3	5%Glu YPD	BY4742prot	Ral 437	2013-01-24	100	10	10	20	109	0.183486	0.5	0.5	1.09	1	N/A
2013-01-29	3	5%Glu YPD	BY4742prot	Ral 437	2013-01-24	100	8	8	16	109	0.146789	0.5	0.5	1.09	1	N/A
2013-01-31	1	5%Glu YPD	BY4741aux	Ral 437	2013-01-25	100	7	19	26	98	0.265306	0.269231	0.730769	0.98	1	N/A
2013-01-31	1	5%Glu YPD	BY4741aux	Ral 437	2013-01-25	100	14	27	41	98	0.418367	0.341463	0.658537	0.98	1	N/A
2013-01-31	1	5%Glu YPD	BY4742aux	Ral 437	2013-01-25	100	6	10	16	98	0.163265	0.375	0.625	0.98	1	N/A
2013-01-31	1	5%Glu YPD	BY4742aux	Ral 437	2013-01-25	100	7	8	15	98	0.153061	0.466667	0.533333	0.98	1	N/A
2013-01-31	2	5%Glu YPD	BY4741aux	Ral 437	2013-01-27	95	16	33	49	112	0.4375	0.326531	0.673469	1.17895	2	BY4742
2013-01-31	2	5%Glu YPD	BY4741aux	Ral 437	2013-01-27	95	12	26	38	112	0.339286	0.315789	0.684211	1.17895	2	BY4742
2013-01-31	2	5%Glu YPD	BY4742aux	Ral 437	2013-01-27	95	6	8	14	112	0.125	0.428571	0.571429	1.17895	2	BY4742
2013-01-31	2	5%Glu YPD	BY4742aux	Ral 437	2013-01-27	95	6	5	11	112	0.0982143	0.545455	0.454545	1.17895	2	BY4742
2013-01-31	3	5%Glu YPD	BY4741prot	Ral 437	2013-01-25	95	8	12	20	98	0.204082	0.4	0.6	1.03158	1	N/A
2013-01-31	3	5%Glu YPD	BY4741prot	Ral 437	2013-01-25	95	6	20	26	98	0.265306	0.230769	0.769231	1.03158	1	N/A
2013-01-31	3	5%Glu YPD	BY4742prot	Ral 437	2013-01-25	95	8	10	18	98	0.183673	0.444444	0.555556	1.03158	1	N/A
2013-01-31	3	5%Glu YPD	BY4742prot	Ral 437	2013-01-25	95	15	19	34	98	0.346939	0.441176	0.558824	1.03158	1	N/A
2013-02-01	1	5%Glu YPD	BY4741aux	Ral 437	2013-01-27	110	5	11	16	85	0.188235	0.3125	0.6875	0.772727	2	BY4742
2013-02-01	1	5%Glu YPD	BY4741aux	Ral 437	2013-01-27	110	16	16	32	85	0.376471	0.5	0.5	0.772727	2	BY4742
2013-02-01	1	5%Glu YPD	BY4742aux	Ral 437	2013-01-27	110	4	10	14	85	0.164706	0.285714	0.714286	0.772727	2	BY4742
2013-02-01	1	5%Glu YPD	BY4742aux	Ral 437	2013-01-27	110	5	18	23	85	0.270588	0.217391	0.782609	0.772727	2	BY4742
2013-02-01	2	5%Glu YPD	BY4741prot	Ral 437	2013-01-28	110	10	12	22	99	0.222222	0.454545	0.545455	0.9	2	BY4742
2013-02-01	2	5%Glu YPD	BY4741prot	Ral 437	2013-01-28	110	9	16	25	99	0.252525	0.36	0.64	0.9	2	BY4742
2013-02-01	2	5%Glu YPD	BY4742prot	Ral 437	2013-01-28	110	14	18	32	99	0.323232	0.4375	0.5625	0.9	2	BY4742
2013-02-01	2	5%Glu YPD	BY4742prot	Ral 437	2013-01-28	110	10	10	20	99	0.20202	0.5	0.5	0.9	2	BY4742
2013-02-06	1	5%Glu YPD	BY4741aux	Ral 437	2013-01-29	120	18	13	31	126	0.246032	0.580645	0.419355	1.05	2	BY4742
2013-02-06	1	5%Glu YPD	BY4741aux	Ral 437	2013-01-29	120	25	24	49	126	0.388889	0.510204	0.489796	1.05	2	BY4742
2013-02-06	1	5%Glu YPD	BY4742aux	Ral 437	2013-01-29	120	10	27	37	126	0.293651	0.27027	0.72973	1.05	2	BY4742
2013-02-06	1	5%Glu YPD	BY4742aux	Ral 437	2013-01-29	120	4	5	9	126	0.0714286	0.444444	0.555556	1.05	2	BY4742
2013-02-06	2	5%Glu YPD	BY4741prot	Ral 437	2013-01-28	100	18	6	24	107	0.224299	0.75	0.25	1.07	2	BY4742
2013-02-06	2	5%Glu YPD	BY4741prot	Ral 437	2013-01-28	100	10	15	25	107	0.233645	0.4	0.6	1.07	2	BY4742
2013-02-06	2	5%Glu YPD	BY4742prot	Ral 437	2013-01-28	100	2	16	18	107	0.168224	0.111111	0.888889	1.07	2	BY4742
2013-02-06	2	5%Glu YPD	BY4742prot	Ral 437	2013-01-28	100	18	22	40	107	0.373832	0.45	0.55	1.07	2	BY4742
2013-02-07	1	5%Glu YPD	BY4741aux	Ral 437	2013-01-29	105	24	28	52	116	0.448276	0.461538	0.538462	1.10476	2	BY4741
2013-02-07	1	5%Glu YPD	BY4741aux	Ral 437	2013-01-29	105	12	17	29	116	0.25	0.413793	0.586207	1.10476	2	BY4741
2013-02-07	1	5%Glu YPD	BY4742aux	Ral 437	2013-01-29	105	15	8	23	116	0.198276	0.652174	0.347826	1.10476	2	BY4741
2013-02-07	1	5%Glu YPD	BY4742aux	Ral 437	2013-01-29	105	4	8	12	116	0.103448	0.333333	0.666667	1.10476	2	BY4741
2013-02-07	2	5%Glu YPD	BY4741prot	Ral 437	2013-01-29	100	16	24	40	109	0.366972	0.4	0.6	1.09	2	BY4741
2013-02-07	2	5%Glu YPD	BY4741prot	Ral 437	2013-01-29	100	13	8	21	109	0.192661	0.619048	0.380952	1.09	2	BY4741
2013-02-07	2	5%Glu YPD	BY4742prot	Ral 437	2013-01-29	100	15	12	27	109	0.247706	0.555556	0.444444	1.09	2	BY4741
2013-02-07	2	5%Glu YPD	BY4742prot	Ral 437	2013-01-29	100	10	11	21	109	0.192661	0.47619	0.52381	1.09	2	BY4741
2013-02-13	1	5%Glu YPD	BY4741aux	Ral 437	2013-01-31	130	21	27	48	134	0.358209	0.4375	0.5625	1.03077	2	BY4742
2013-02-13	1	5%Glu YPD	BY4741aux	Ral 437	2013-01-31	130	16	29	45	134	0.335821	0.355556	0.644444	1.03077	2	BY4742
2013-02-13	1	5%Glu YPD	BY4742aux	Ral 437	2013-01-31	130	6	11	17	134	0.126866	0.352941	0.647059	1.03077	2	BY4742
2013-02-13	1	5%Glu YPD	BY4742aux	Ral 437	2013-01-31	130	9	15	24	134	0.179104	0.375	0.625	1.03077	2	BY4742
2013-02-13	2	5%Glu YPD	BY4741prot	Ral 437	2013-01-31	130	14	14	28	131	0.21374	0.5	0.5	1.00769	2	BY4742
2013-02-13	2	5%Glu YPD	BY4741prot	Ral 437	2013-01-31	130	16	20	36	131	0.274809	0.444444	0.555556	1.00769	2	BY4742
2013-02-13	2	5%Glu YPD	BY4742prot	Ral 437	2013-01-31	130	25	16	41	131	0.312977	0.609756	0.390244	1.00769	2	BY4742
2013-02-13	2	5%Glu YPD	BY4742prot	Ral 437	2013-01-31	130	12	14	26	131	0.198473	0.461538	0.538462	1.00769	2	BY4742
2013-02-14	1	5%Glu YPD	BY4741prot	Ral 437	2013-02-03	130	8	23	31	104	0.298077	0.258065	0.741935	0.8	2	BY4741
2013-02-14	1	5%Glu YPD	BY4741prot	Ral 437	2013-02-03	130	13	25	38	104	0.365385	0.342105	0.657895	0.8	2	BY4741
2013-02-14	1	5%Glu YPD	BY4742prot	Ral 437	2013-02-03	130	11	16	27	104	0.259615	0.407407	0.592593	0.8	2	BY4741
2013-02-14	1	5%Glu YPD	BY4742prot	Ral 437	2013-02-03	130	5	3	8	104	0.0769231	0.625	0.375	0.8	2	BY4741
2013-02-14	2	5%Glu YPD	BY4741prot	Ral 437	2013-02-04	140	12	38	50	136	0.367647	0.24	0.76	0.971429	2	BY4741
2013-02-14	2	5%Glu YPD	BY4741prot	Ral 437	2013-02-04	140	9	15	24	136	0.176471	0.375	0.625	0.971429	2	BY4741
2013-02-14	2	5%Glu YPD	BY4742prot	Ral 437	2013-02-04	140	16	14	30	136	0.220588	0.533333	0.466667	0.971429	2	BY4741
2013-02-14	2	5%Glu YPD	BY4742prot	Ral 437	2013-02-04	140	9	23	32	136	0.235294	0.28125	0.71875	0.971429	2	BY4741
2013-02-15	1	5%Glu YPD	BY4741aux	Ral 437	2013-02-04	125	24	18	42	125	0.336	0.571429	0.428571	1	2	BY4742
2013-02-15	1	5%Glu YPD	BY4741aux	Ral 437	2013-02-04	125	17	18	35	125	0.28	0.485714	0.514286	1	2	BY4742
2013-02-15	1	5%Glu YPD	BY4742aux	Ral 437	2013-02-04	125	5	10	15	125	0.12	0.333333	0.666667	1	2	BY4742
2013-02-15	1	5%Glu YPD	BY4742aux	Ral 437	2013-02-04	125	6	27	33	125	0.264	0.181818	0.818182	1	2	BY4742
2013-02-15	2	5%Glu YPD	BY4741prot	Ral 437	2013-02-04	125	17	27	44	145	0.303448	0.386364	0.613636	1.16	2	BY4741
2013-02-15	2	5%Glu YPD	BY4741prot	Ral 437	2013-02-04	125	20	12	32	145	0.22069	0.625	0.375	1.16	2	BY4741
2013-02-15	2	5%Glu YPD	BY4742prot	Ral 437	2013-02-04	125	10	18	28	145	0.193103	0.357143	0.642857	1.16	2	BY4741
2013-02-15	2	5%Glu YPD	BY4742prot	Ral 437	2013-02-04	125	11	30	41	145	0.282759	0.268293	0.731707	1.16	2	BY4741
2013-02-21	1	5%Glu YPD	BY4741aux	Ral437	2013-02-06	140	20	16	36	153	0.235294	0.555556	0.444444	1.09286	2	BY4742
2013-02-21	1	5%Glu YPD	BY4741aux	Ral437	2013-02-06	140	25	20	45	153	0.294118	0.555556	0.444444	1.09286	2	BY4742
2013-02-21	1	5%Glu YPD	BY4742aux	Ral437	2013-02-06	140	20	25	45	153	0.294118	0.444444	0.555556	1.09286	2	BY4742
2013-02-21	1	5%Glu YPD	BY4742aux	Ral437	2013-02-06	140	17	10	27	153	0.176471	0.62963	0.37037	1.09286	2	BY4742
2013-02-21	2	5%Glu YPD	BY4741prot	Ral437	2013-02-06	140	3	3	6	148	0.0405405	0.5	0.5	1.05714	2	BY4742
2013-02-21	2	5%Glu YPD	BY4741prot	Ral437	2013-02-06	140	22	24	46	148	0.310811	0.478261	0.521739	1.05714	2	BY4742
2013-02-21	2	5%Glu YPD	BY4742prot	Ral437	2013-02-06	140	18	26	44	148	0.297297	0.409091	0.590909	1.05714	2	BY4742
2013-02-21	2	5%Glu YPD	BY4742prot	Ral437	2013-02-06	140	22	30	52	148	0.351351	0.423077	0.576923	1.05714	2	BY4742
2013-02-20	1	5%Glu YPD	BY4741prot	Ral437	2013-02-05	138	21	16	37	155	0.23871	0.567568	0.432432	1.12319	2	BY4741
2013-02-20	1	5%Glu YPD	BY4741prot	Ral437	2013-02-05	138	25	33	58	155	0.374194	0.431034	0.568966	1.12319	2	BY4741
2013-02-20	1	5%Glu YPD	BY4742prot	Ral437	2013-02-05	138	16	15	31	155	0.2	0.516129	0.483871	1.12319	2	BY4741
2013-02-20	1	5%Glu YPD	BY4742prot	Ral437	2013-02-05	138	20	9	29	155	0.187097	0.689655	0.310345	1.12319	2	BY4741
2013-02-20	2	5%Glu YPD	BY4741aux	Ral437	2013-02-05	147	47	34	81	152	0.532895	0.580247	0.419753	1.03401	2	BY4741
2013-02-20	2	5%Glu YPD	BY4741aux	Ral437	2013-02-05	147	36	22	58	152	0.381579	0.62069	0.37931	1.03401	2	BY4741
2013-02-20	2	5%Glu YPD	BY4742aux	Ral437	2013-02-05	147	0	0	0	152	0	#DIV/0!	#DIV/0!	1.03401	2	BY4741
2013-02-20	2	5%Glu YPD	BY4742aux	Ral437	2013-02-05	147	6	7	13	152	0.0855263	0.461538	0.538462	1.03401	2	BY4741

## Sheet: parentals_mat_5_30.csv
Fly Genotype	Strain	Count	Total_Caught	Attractiveness	Percent_Caught	Trap_Type	Trial_Number	Trial_code	Trial_Type
Ral 437	BY4741a	82	116	0.706897	0.8	3	1	1	41a_42a
Ral 437	BY4742a	34	116	0.293103	0.8	3	1	1	41a_42a
Ral 437	BY4741p	65	137	0.474453	0.98	3	1	3	41p_42p
Ral 437	BY4742p	72	137	0.525547	0.98	3	1	3	41p_42p
Ral 437	BY4741a	114	154	0.74026	0.85	3	2	4	41a_42a
Ral 437	BY4742a	40	154	0.25974	0.85	3	2	4	41a_42a
Ral 437	BY4741p	68	131	0.519084	0.92	3	2	5	41p_42p
Ral 437	BY4742p	63	131	0.480916	0.92	3	2	5	41p_42p
Ral 437	BY4741p	80	119	0.672269	0.99	3	3	7	41p_42p
Ral 437	BY4742p	38	119	0.319328	0.99	3	3	7	41p_42p
Ral 437	BY4741a	65	99	0.656566	0.94	3	3	8	41a_42a
Ral 437	BY4742a	24	99	0.242424	0.94	3	3	8	41a_42a
Ral 437	BY4741a	46	72	0.638889	0.72	3	4	9	41a_42a
Ral 437	BY4742a	26	72	0.361111	0.72	3	4	9	41a_42a
Ral 437	BY4741a	57	93	0.612903	1	3	5	10	41a_42a
Ral 437	BY4742a	36	93	0.387097	1	3	5	10	41a_42a
Ral 437	BY4741a	66	96	0.6875	0.96	1	1	11	41a_42a
Ral 437	BY4742a	30	96	0.3125	0.96	2	1	11	41a_42a
Ral 437	BY4741p	73	109	0.669725	1.09	3	4	12	41p_42p
Ral 437	BY4742p	36	109	0.330275	1.09	3	4	12	41p_42p
Ral 437	BY4741a	67	98	0.683673	0.98	3	6	14	41a_42a
Ral 437	BY4742a	31	98	0.316327	0.98	3	6	14	41a_42a
Ral 437	BY4741a	87	112	0.776786	1.17	2	1	15	41a_42a
Ral 437	BY4742a	35	112	0.3125	1.17	1	1	15	41a_42a
Ral 437	BY4741p	46	98	0.469388	1.03	3	5	16	41p_42p
Ral 437	BY4742p	52	98	0.530612	1.03	3	5	16	41p_42p
Ral 437	BY4741a	48	85	0.564706	0.77	2	2	19	41a_42a
Ral 437	BY4742a	37	85	0.435294	0.77	1	2	19	41a_42a
Ral 437	BY4741p	47	99	0.474747	0.9	2	1	20	41p_42p
Ral 437	BY4742p	52	99	0.525253	0.9	1	1	20	41p_42p
Ral 437	BY4741a	80	126	0.634921	1.05	2	3	23	41a_42a
Ral 437	BY4742a	46	126	0.365079	1.05	1	3	23	41a_42a
Ral 437	BY4741p	49	107	0.457944	1.07	2	2	24	41p_42p
Ral 437	BY4742p	58	107	0.542056	1.07	1	2	24	41p_42p
Ral 437	BY4741a	81	116	0.698276	1.1	1	1	27	41a_42a
Ral 437	BY4742a	35	116	0.301724	1.1	2	1	27	41a_42a
Ral 437	BY4741p	61	109	0.559633	1.09	1	1	28	41p_42p
Ral 437	BY4742p	48	109	0.440367	1.09	2	1	28	41p_42p
Ral 437	BY4741a	93	134	0.69403	1.03	2	4	31	41a_42a
Ral 437	BY4742a	41	134	0.30597	1.03	1	4	31	41a_42a
Ral 437	BY4741p	64	131	0.48855	1.01	2	3	32	41p_42p
Ral 437	BY4742p	67	131	0.51145	1.01	1	3	32	41p_42p
Ral 437	BY4741p	69	104	0.663462	0.8	2	2	35	41p_42p
Ral 437	BY4742p	35	104	0.336538	0.8	1	2	35	41p_42p
Ral 437	BY4741p	74	136	0.544118	0.97	2	3	36	41p_42p
Ral 437	BY4742p	62	136	0.455882	0.97	1	3	36	41p_42p
Ral 437	BY4741a	77	125	0.616	1.02	2	5	39	41a_42a
Ral 437	BY4742a	48	125	0.384	1.02	1	5	39	41a_42a
Ral 437	BY4741p	76	145	0.524138	1.16	1	4	40	41p_42p
Ral 437	BY4742p	69	145	0.475862	1.16	2	4	40	41p_42p
Ral 437	BY4741a	81	153	0.529412	1.09	2	6	43	41a_42a
Ral 437	BY4742a	72	153	0.470588	1.09	1	6	43	41a_42a
Ral 437	BY4741p	52	148	0.351351	1.05	2	4	44	41p_42p
Ral 437	BY4742p	96	148	0.648649	1.05	1	4	44	41p_42p
Ral 437	BY4741a	139	152	0.914474	1.03	1	2	45	41a_42a
Ral 437	BY4742a	13	152	0.0855263	1.03	2	2	45	41a_42a
Ral 437	BY4741p	95	155	0.612903	1.12	1	5	46	41p_42p
Ral 437	BY4742p	160	155	1.03226	1.12	2	5	46	41p_42p

## Sheet: 42_v_Tet
Date Counted	Trial	Media	Yeast	Fly Line	1 day old date(of youngest)	# of flies	Female	Male	Total	Total Caught	Percentage Caught	Percetage Female	Percentage Male	Percentage Flies Trapped	Trap Orientation	Near Light
2013-02-22	1	5%Glu YPD	BY4742aux	Ral437	2013-02-08	142	10	1	11	113	0.0973451	0.909091	0.0909091	0.795775	2	Tetrad10_A
2013-02-22	1	5%Glu YPD	BY4742aux	Ral437	2013-02-08	142	3	10	13	113	0.115044	0.230769	0.769231	0.795775	2	Tetrad10_A
2013-02-22	1	5%Glu YPD	Tetrad10_A	Ral437	2013-02-08	142	23	25	48	113	0.424779	0.479167	0.520833	0.795775	2	Tetrad10_A
2013-02-22	1	5%Glu YPD	Tetrad10_A	Ral437	2013-02-08	142	21	20	41	113	0.362832	0.512195	0.487805	0.795775	2	Tetrad10_A
2013-02-22	2	5%Glu YPD	BY4742aux	Ral437	2013-02-12	140	6	5	11	108	0.101852	0.545455	0.454545	0.771429	2	Tetrad10_B
2013-02-22	2	5%Glu YPD	BY4742aux	Ral437	2013-02-12	140	3	3	6	108	0.0555556	0.5	0.5	0.771429	2	Tetrad10_B
2013-02-22	2	5%Glu YPD	Tetrad10_B	Ral437	2013-02-12	140	17	18	35	108	0.324074	0.485714	0.514286	0.771429	2	Tetrad10_B
2013-02-22	2	5%Glu YPD	Tetrad10_B	Ral437	2013-02-12	140	29	27	56	108	0.518519	0.517857	0.482143	0.771429	2	Tetrad10_B
2013-02-22	3	5%Glu YPD	BY4742aux	Ral437	2013-02-08	145	8	5	13	127	0.102362	0.615385	0.384615	0.875862	2	Tetrad10_C
2013-02-22	3	5%Glu YPD	BY4742aux	Ral437	2013-02-08	145	11	9	20	127	0.15748	0.55	0.45	0.875862	2	Tetrad10_C
2013-02-22	3	5%Glu YPD	Tetrad10_C	Ral437	2013-02-08	145	18	53	71	127	0.559055	0.253521	0.746479	0.875862	2	Tetrad10_C
2013-02-22	3	5%Glu YPD	Tetrad10_C	Ral437	2013-02-08	145	7	16	23	127	0.181102	0.304348	0.695652	0.875862	2	Tetrad10_C
2013-02-22	4	5%Glu YPD	BY4742aux	Ral437	2013-02-12	140	6	9	15	123	0.121951	0.4	0.6	0.878571	2	Tetrad10_D
2013-02-22	4	5%Glu YPD	BY4742aux	Ral437	2013-02-12	140	20	4	24	123	0.195122	0.833333	0.166667	0.878571	2	Tetrad10_D
2013-02-22	4	5%Glu YPD	Tetrad10_D	Ral437	2013-02-12	140	17	32	49	123	0.398374	0.346939	0.653061	0.878571	2	Tetrad10_D
2013-02-22	4	5%Glu YPD	Tetrad10_D	Ral437	2013-02-12	140	25	20	45	123	0.365854	0.555556	0.444444	0.878571	2	Tetrad10_D
2013-02-26	1	5%Glu YPD	BY4742aux	Ral437	2013-02-13	123	12	23	35	107	0.327103	0.342857	0.657143	0.869919	2	BY4742aux
2013-02-26	1	5%Glu YPD	BY4742aux	Ral437	2013-02-13	123	3	15	18	107	0.168224	0.166667	0.833333	0.869919	2	BY4742aux
2013-02-26	1	5%Glu YPD	Tetrad10_A	Ral437	2013-02-13	123	7	20	27	107	0.252336	0.259259	0.740741	0.869919	2	BY4742aux
2013-02-26	1	5%Glu YPD	Tetrad10_A	Ral437	2013-02-13	123	9	18	27	107	0.252336	0.333333	0.666667	0.869919	2	BY4742aux
2013-02-26	2	5%Glu YPD	BY4742aux	Ral437	2013-02-14	128	14	15	29	110	0.263636	0.482759	0.517241	0.859375	2	BY4742aux
2013-02-26	2	5%Glu YPD	BY4742aux	Ral437	2013-02-14	128	13	24	37	110	0.336364	0.351351	0.648649	0.859375	2	BY4742aux
2013-02-26	2	5%Glu YPD	Tetrad10_C	Ral437	2013-02-14	128	6	22	28	110	0.254545	0.214286	0.785714	0.859375	2	BY4742aux
2013-02-26	2	5%Glu YPD	Tetrad10_C	Ral437	2013-02-14	128	9	4	13	110	0.118182	0.692308	0.307692	0.859375	2	BY4742aux
2013-02-26	3	5%Glu YPD	BY4742aux	Ral437	2013-02-13	124	2	14	16	102	0.156863	0.125	0.875	0.822581	2	BY4742aux
2013-02-26	3	5%Glu YPD	BY4742aux	Ral437	2013-02-13	124	8	24	32	102	0.313725	0.25	0.75	0.822581	2	BY4742aux
2013-02-26	3	5%Glu YPD	Tetrad10_D	Ral437	2013-02-13	124	7	13	20	102	0.196078	0.35	0.65	0.822581	2	BY4742aux
2013-02-26	3	5%Glu YPD	Tetrad10_D	Ral437	2013-02-13	124	8	26	34	102	0.333333	0.235294	0.764706	0.822581	2	BY4742aux
2013-02-27	1	5%Glu YPD	BY4742aux	Ral437	2013-02-18	125	5	4	9	116	0.0775862	0.555556	0.444444	0.928	1	N/A
2013-02-27	1	5%Glu YPD	BY4742aux	Ral437	2013-02-18	125	8	8	16	116	0.137931	0.5	0.5	0.928	1	N/A
2013-02-27	1	5%Glu YPD	Tetrad10_A	Ral437	2013-02-18	125	20	36	56	116	0.482759	0.357143	0.642857	0.928	1	N/A
2013-02-27	1	5%Glu YPD	Tetrad10_A	Ral437	2013-02-18	125	14	21	35	116	0.301724	0.4	0.6	0.928	1	N/A
2013-02-27	2	5%Glu YPD	BY4742aux	Ral437	2013-02-15	135	14	22	36	98	0.367347	0.388889	0.611111	0.725926	1	N/A
2013-02-27	2	5%Glu YPD	BY4742aux	Ral437	2013-02-15	135	9	16	25	98	0.255102	0.36	0.64	0.725926	1	N/A
2013-02-27	2	5%Glu YPD	Tetrad10_B	Ral437	2013-02-15	135	11	13	24	98	0.244898	0.458333	0.541667	0.725926	1	N/A
2013-02-27	2	5%Glu YPD	Tetrad10_B	Ral437	2013-02-15	135	11	2	13	98	0.132653	0.846154	0.153846	0.725926	1	N/A
2013-02-27	3	5%Glu YPD	BY4742aux	Ral437	2013-02-13	127	4	14	18	120	0.15	0.222222	0.777778	0.944882	1	N/A
2013-02-27	3	5%Glu YPD	BY4742aux	Ral437	2013-02-13	127	11	9	20	120	0.166667	0.55	0.45	0.944882	1	N/A
2013-02-27	3	5%Glu YPD	Tetrad10_C	Ral437	2013-02-13	127	12	27	39	120	0.325	0.307692	0.692308	0.944882	1	N/A
2013-02-27	3	5%Glu YPD	Tetrad10_C	Ral437	2013-02-13	127	19	24	43	120	0.358333	0.44186	0.55814	0.944882	1	N/A
2013-02-27	4	5%Glu YPD	BY4742aux	Ral437	2013-02-14	126	7	12	19	117	0.162393	0.368421	0.631579	0.928571	1	N/A
2013-02-27	4	5%Glu YPD	BY4742aux	Ral437	2013-02-14	126	5	16	21	117	0.179487	0.238095	0.761905	0.928571	1	N/A
2013-02-27	4	5%Glu YPD	Tetrad10_D	Ral437	2013-02-14	126	16	10	26	117	0.222222	0.615385	0.384615	0.928571	1	N/A
2013-02-27	4	5%Glu YPD	Tetrad10_D	Ral437	2013-02-14	126	19	32	51	117	0.435897	0.372549	0.627451	0.928571	1	N/A
2013-03-01	1	5%Glu YPD	BY4742aux	Ral437	2013-02-18	130	8	12	20	106	0.188679	0.4	0.6	0.815385	2	Tetrad1_A
2013-03-01	1	5%Glu YPD	BY4742aux	Ral437	2013-02-18	130	5	8	13	106	0.122642	0.384615	0.615385	0.815385	2	Tetrad1_A
2013-03-01	1	5%Glu YPD	Tetrad1_A	Ral437	2013-02-18	130	10	32	42	106	0.396226	0.238095	0.761905	0.815385	2	Tetrad1_A
2013-03-01	1	5%Glu YPD	Tetrad1_A	Ral437	2013-02-18	130	16	15	31	106	0.292453	0.516129	0.483871	0.815385	2	Tetrad1_A
2013-03-01	2	5%Glu YPD	BY4742aux	Ral437	2013-02-18	140	5	5	10	109	0.0917431	0.5	0.5	0.778571	2	Tetrad1_B
2013-03-01	2	5%Glu YPD	BY4742aux	Ral437	2013-02-18	140	4	5	9	109	0.0825688	0.444444	0.555556	0.778571	2	Tetrad1_B
2013-03-01	2	5%Glu YPD	Tetrad1_B	Ral437	2013-02-18	140	27	25	52	109	0.477064	0.519231	0.480769	0.778571	2	Tetrad1_B
2013-03-01	2	5%Glu YPD	Tetrad1_B	Ral437	2013-02-18	140	16	22	38	109	0.348624	0.421053	0.578947	0.778571	2	Tetrad1_B
2013-03-01	3	5%Glu YPD	BY4742aux	Ral437	2013-02-18	130	6	9	15	116	0.12931	0.4	0.6	0.892308	2	Tetrad1_C
2013-03-01	3	5%Glu YPD	BY4742aux	Ral437	2013-02-18	130	5	5	10	116	0.0862069	0.5	0.5	0.892308	2	Tetrad1_C
2013-03-01	3	5%Glu YPD	Tetrad1_C	Ral437	2013-02-18	130	10	28	38	116	0.327586	0.263158	0.736842	0.892308	2	Tetrad1_C
2013-03-01	3	5%Glu YPD	Tetrad1_C	Ral437	2013-02-18	130	16	37	53	116	0.456897	0.301887	0.698113	0.892308	2	Tetrad1_C
2013-03-01	4	5%Glu YPD	BY4742aux	Ral437	2013-02-18	132	0	0	0	117	0	#DIV/0!	#DIV/0!	0.886364	2	Tetrad1_D
2013-03-01	4	5%Glu YPD	BY4742aux	Ral437	2013-02-18	132	15	10	25	117	0.213675	0.6	0.4	0.886364	2	Tetrad1_D
2013-03-01	4	5%Glu YPD	Tetrad1_D	Ral437	2013-02-18	132	17	30	47	117	0.401709	0.361702	0.638298	0.886364	2	Tetrad1_D
2013-03-01	4	5%Glu YPD	Tetrad1_D	Ral437	2013-02-18	132	19	26	45	117	0.384615	0.422222	0.577778	0.886364	2	Tetrad1_D
2013-03-05	1	5%Glu YPD	BY4742aux	Ral437	2013-02-19	118	8	10	18	96	0.1875	0.444444	0.555556	0.813559	2	BY4742aux
2013-03-05	1	5%Glu YPD	BY4742aux	Ral437	2013-02-19	118	4	12	16	96	0.166667	0.25	0.75	0.813559	2	BY4742aux
2013-03-05	1	5%Glu YPD	Tetrad1_A	Ral437	2013-02-19	118	10	8	18	96	0.1875	0.555556	0.444444	0.813559	2	BY4742aux
2013-03-05	1	5%Glu YPD	Tetrad1_A	Ral437	2013-02-19	118	7	7	14	96	0.145833	0.5	0.5	0.813559	2	BY4742aux
2013-03-05	2	5%Glu YPD	BY4742aux	Ral437	2013-02-19	125	4	1	5	87	0.0574713	0.8	0.2	0.696	2	BY4742aux
2013-03-05	2	5%Glu YPD	BY4742aux	Ral437	2013-02-19	125	9	12	21	87	0.241379	0.428571	0.571429	0.696	2	BY4742aux
2013-03-05	2	5%Glu YPD	Tetrad1_B	Ral437	2013-02-19	125	10	19	29	87	0.333333	0.344828	0.655172	0.696	2	BY4742aux
2013-03-05	2	5%Glu YPD	Tetrad1_B	Ral437	2013-02-19	125	14	18	32	87	0.367816	0.4375	0.5625	0.696	2	BY4742aux
2013-03-05	3	5%Glu YPD	BY4742aux	Ral437	2013-02-19	128	11	10	21	71	0.295775	0.52381	0.47619	0.554688	2	BY4742aux
2013-03-05	3	5%Glu YPD	BY4742aux	Ral437	2013-02-19	128	9	6	15	71	0.211268	0.6	0.4	0.554688	2	BY4742aux
2013-03-05	3	5%Glu YPD	Tetrad1_C	Ral437	2013-02-19	128	6	2	8	71	0.112676	0.75	0.25	0.554688	2	BY4742aux
2013-03-05	3	5%Glu YPD	Tetrad1_C	Ral437	2013-02-19	128	14	13	27	71	0.380282	0.518519	0.481481	0.554688	2	BY4742aux
2013-03-05	4	5%Glu YPD	BY4742aux	Ral437	2013-02-19	127	7	7	14	101	0.138614	0.5	0.5	0.795276	2	BY4742aux
2013-03-05	4	5%Glu YPD	BY4742aux	Ral437	2013-02-19	127	11	11	22	101	0.217822	0.5	0.5	0.795276	2	BY4742aux
2013-03-05	4	5%Glu YPD	Tetrad1_D	Ral437	2013-02-19	127	10	10	20	101	0.19802	0.5	0.5	0.795276	2	BY4742aux
2013-03-05	4	5%Glu YPD	Tetrad1_D	Ral437	2013-02-19	127	16	16	32	101	0.316832	0.5	0.5	0.795276	2	BY4742aux
2013-03-06	1	5%Glu YPD	BY4742aux	Ral437	2013-02-22	125	5	6	11	93	0.11828	0.454545	0.545455	0.744	1	N/A
2013-03-06	1	5%Glu YPD	BY4742aux	Ral437	2013-02-22	125	6	10	16	93	0.172043	0.375	0.625	0.744	1	N/A
2013-03-06	1	5%Glu YPD	Tetrad1_A	Ral437	2013-02-22	125	14	11	25	93	0.268817	0.56	0.44	0.744	1	N/A
2013-03-06	1	5%Glu YPD	Tetrad1_A	Ral437	2013-02-22	125	21	20	41	93	0.44086	0.512195	0.487805	0.744	1	N/A
2013-03-06	2	5%Glu YPD	BY4742aux	Ral437	2013-02-25	130	5	7	12	94	0.12766	0.416667	0.583333	0.723077	1	N/A
2013-03-06	2	5%Glu YPD	BY4742aux	Ral437	2013-02-25	130	7	1	8	94	0.0851064	0.875	0.125	0.723077	1	N/A
2013-03-06	2	5%Glu YPD	Tetrad1_B	Ral437	2013-02-25	130	8	16	24	94	0.255319	0.333333	0.666667	0.723077	1	N/A
2013-03-06	2	5%Glu YPD	Tetrad1_B	Ral437	2013-02-25	130	19	31	50	94	0.531915	0.38	0.62	0.723077	1	N/A
2013-03-06	3	5%Glu YPD	BY4742aux	Ral437	2013-02-25	125	7	17	24	78	0.307692	0.291667	0.708333	0.624	1	N/A
2013-03-06	3	5%Glu YPD	BY4742aux	Ral437	2013-02-25	125	7	5	12	78	0.153846	0.583333	0.416667	0.624	1	N/A
2013-03-06	3	5%Glu YPD	Tetrad1_C	Ral437	2013-02-25	125	11	4	15	78	0.192308	0.733333	0.266667	0.624	1	N/A
2013-03-06	3	5%Glu YPD	Tetrad1_C	Ral437	2013-02-25	125	11	16	27	78	0.346154	0.407407	0.592593	0.624	1	N/A
2013-03-06	4	5%Glu YPD	BY4742aux	Ral437	2013-02-25	121	6	9	15	84	0.178571	0.4	0.6	0.694215	1	N/A
2013-03-06	4	5%Glu YPD	BY4742aux	Ral437	2013-02-25	121	8	9	17	84	0.202381	0.470588	0.529412	0.694215	1	N/A
2013-03-06	4	5%Glu YPD	Tetrad1_D	Ral437	2013-02-25	121	9	11	20	84	0.238095	0.45	0.55	0.694215	1	N/A
2013-03-06	4	5%Glu YPD	Tetrad1_D	Ral437	2013-02-25	121	8	24	32	84	0.380952	0.25	0.75	0.694215	1	N/A
2013-03-08	1	5%Glu YPD	BY4742aux	Ral437	2013-02-27	119	7	10	17	81	0.209877	0.411765	0.588235	0.680672	2	Tetrad18_A
2013-03-08	1	5%Glu YPD	BY4742aux	Ral437	2013-02-27	119	4	5	9	81	0.111111	0.444444	0.555556	0.680672	2	Tetrad18_A
2013-03-08	1	5%Glu YPD	Tetrad18_A	Ral437	2013-02-27	119	12	17	29	81	0.358025	0.413793	0.586207	0.680672	2	Tetrad18_A
2013-03-08	1	5%Glu YPD	Tetrad18_A	Ral437	2013-02-27	119	12	14	26	81	0.320988	0.461538	0.538462	0.680672	2	Tetrad18_A
2013-03-08	2	5%Glu YPD	BY4742aux	Ral437	2013-02-28	108	1	9	10	56	0.178571	0.1	0.9	0.518519	2	Tetrad18_B
2013-03-08	2	5%Glu YPD	BY4742aux	Ral437	2013-02-28	108	2	11	13	56	0.232143	0.153846	0.846154	0.518519	2	Tetrad18_B
2013-03-08	2	5%Glu YPD	Tetrad18_B	Ral437	2013-02-28	108	3	3	6	56	0.107143	0.5	0.5	0.518519	2	Tetrad18_B
2013-03-08	2	5%Glu YPD	Tetrad18_B	Ral437	2013-02-28	108	6	21	27	56	0.482143	0.222222	0.777778	0.518519	2	Tetrad18_B
2013-03-08	3	5%Glu YPD	BY4742aux	Ral437	2013-02-26	125	2	5	7	99	0.0707071	0.285714	0.714286	0.792	2	Tetrad18_C
2013-03-08	3	5%Glu YPD	BY4742aux	Ral437	2013-02-26	125	6	9	15	99	0.151515	0.4	0.6	0.792	2	Tetrad18_C
2013-03-08	3	5%Glu YPD	Tetrad18_C	Ral437	2013-02-26	125	18	36	54	99	0.545455	0.333333	0.666667	0.792	2	Tetrad18_C
2013-03-08	3	5%Glu YPD	Tetrad18_C	Ral437	2013-02-26	125	12	11	23	99	0.232323	0.521739	0.478261	0.792	2	Tetrad18_C
2013-03-08	4	5%Glu YPD	BY4742aux	Ral437	2013-02-27	125	4	15	19	98	0.193878	0.210526	0.789474	0.784	2	Tetrad18_D
2013-03-08	4	5%Glu YPD	BY4742aux	Ral437	2013-02-27	125	7	11	18	98	0.183673	0.388889	0.611111	0.784	2	Tetrad18_D
2013-03-08	4	5%Glu YPD	Tetrad18_D	Ral437	2013-02-27	125	12	36	48	98	0.489796	0.25	0.75	0.784	2	Tetrad18_D
2013-03-08	4	5%Glu YPD	Tetrad18_D	Ral437	2013-02-27	125	6	7	13	98	0.132653	0.461538	0.538462	0.784	2	Tetrad18_D
2013-03-12	1	5%Glu YPD	BY4742aux	Ral437	2013-03-04	125	12	10	22	114	0.192982	0.545455	0.454545	0.912	2	BY4742aux
2013-03-12	1	5%Glu YPD	BY4742aux	Ral437	2013-03-04	125	10	10	20	114	0.175439	0.5	0.5	0.912	2	BY4742aux
2013-03-12	1	5%Glu YPD	Tetrad18_A	Ral437	2013-03-04	125	25	17	42	114	0.368421	0.595238	0.404762	0.912	2	BY4742aux
2013-03-12	1	5%Glu YPD	Tetrad18_A	Ral437	2013-03-04	125	16	13	29	114	0.254386	0.551724	0.448276	0.912	2	BY4742aux
2013-03-12	2	5%Glu YPD	BY4742aux	Ral437	2013-03-04	123	6	3	9	111	0.0810811	0.666667	0.333333	0.902439	2	BY4742aux
2013-03-12	2	5%Glu YPD	BY4742aux	Ral437	2013-03-04	123	18	25	43	111	0.387387	0.418605	0.581395	0.902439	2	BY4742aux
2013-03-12	2	5%Glu YPD	Tetrad18_B	Ral437	2013-03-04	123	10	16	26	111	0.234234	0.384615	0.615385	0.902439	2	BY4742aux
2013-03-12	2	5%Glu YPD	Tetrad18_B	Ral437	2013-03-04	123	18	15	33	111	0.297297	0.545455	0.454545	0.902439	2	BY4742aux
2013-03-12	3	5%Glu YPD	BY4742aux	Ral437	2013-03-04	120	15	3	18	103	0.174757	0.833333	0.166667	0.858333	2	BY4742aux
2013-03-12	3	5%Glu YPD	BY4742aux	Ral437	2013-03-04	120	23	28	51	103	0.495146	0.45098	0.54902	0.858333	2	BY4742aux
2013-03-12	3	5%Glu YPD	Tetrad18_C	Ral437	2013-03-04	120	8	10	18	103	0.174757	0.444444	0.555556	0.858333	2	BY4742aux
2013-03-12	3	5%Glu YPD	Tetrad18_C	Ral437	2013-03-04	120	14	2	16	103	0.15534	0.875	0.125	0.858333	2	BY4742aux
2013-03-12	4	5%Glu YPD	BY4742aux	Ral437	2013-03-01	120	14	15	29	103	0.281553	0.482759	0.517241	0.858333	2	BY4742aux
2013-03-12	4	5%Glu YPD	BY4742aux	Ral437	2013-03-01	120	27	15	42	103	0.407767	0.642857	0.357143	0.858333	2	BY4742aux
2013-03-12	4	5%Glu YPD	Tetrad18_D	Ral437	2013-03-01	120	9	6	15	103	0.145631	0.6	0.4	0.858333	2	BY4742aux
2013-03-12	4	5%Glu YPD	Tetrad18_D	Ral437	2013-03-01	120	15	2	17	103	0.165049	0.882353	0.117647	0.858333	2	BY4742aux
2013-03-13	1	5%Glu YPD	BY4742aux	Ral437	2013-03-05	117	8	8	16	115	0.13913	0.5	0.5	0.982906	1	N/A
2013-03-13	1	5%Glu YPD	BY4742aux	Ral437	2013-03-05	117	9	7	16	115	0.13913	0.5625	0.4375	0.982906	1	N/A
2013-03-13	1	5%Glu YPD	Tetrad18_A	Ral437	2013-03-05	117	17	13	30	115	0.26087	0.566667	0.433333	0.982906	1	N/A
2013-03-13	1	5%Glu YPD	Tetrad18_A	Ral437	2013-03-05	117	25	28	53	115	0.46087	0.471698	0.528302	0.982906	1	N/A
2013-03-13	2	5%Glu YPD	BY4742aux	Ral437	2013-03-04	122	5	9	14	119	0.117647	0.357143	0.642857	0.97541	1	N/A
2013-03-13	2	5%Glu YPD	BY4742aux	Ral437	2013-03-04	122	6	5	11	119	0.092437	0.545455	0.454545	0.97541	1	N/A
2013-03-13	2	5%Glu YPD	Tetrad18_B	Ral437	2013-03-04	122	6	13	19	119	0.159664	0.315789	0.684211	0.97541	1	N/A
2013-03-13	2	5%Glu YPD	Tetrad18_B	Ral437	2013-03-04	122	37	38	75	119	0.630252	0.493333	0.506667	0.97541	1	N/A
2013-03-13	3	5%Glu YPD	BY4742aux	Ral437	2013-03-04	126	4	4	8	119	0.0672269	0.5	0.5	0.944444	1	N/A
2013-03-13	3	5%Glu YPD	BY4742aux	Ral437	2013-03-04	126	1	2	3	119	0.0252101	0.333333	0.666667	0.944444	1	N/A
2013-03-13	3	5%Glu YPD	Tetrad18_C	Ral437	2013-03-04	126	10	24	34	119	0.285714	0.294118	0.705882	0.944444	1	N/A
2013-03-13	3	5%Glu YPD	Tetrad18_C	Ral437	2013-03-04	126	28	46	74	119	0.621849	0.378378	0.621622	0.944444	1	N/A
2013-03-13	4	5%Glu YPD	BY4742aux	Ral437	2013-03-04	125	0	1	1	108	0.00925926	0	1	0.864	1	N/A
2013-03-13	4	5%Glu YPD	BY4742aux	Ral437	2013-03-04	125	20	21	41	108	0.37963	0.487805	0.512195	0.864	1	N/A
2013-03-13	4	5%Glu YPD	Tetrad18_D	Ral437	2013-03-04	125	30	33	63	108	0.583333	0.47619	0.52381	0.864	1	N/A
2013-03-13	4	5%Glu YPD	Tetrad18_D	Ral437	2013-03-04	125	3	0	3	108	0.0277778	1	0	0.864	1	N/A
2013-05-15	1	5%Glu YPD	BY4742aux	Ral437	2013-05-06	120	7	6	13	133	0.0977444	0.538462	0.461538	1.10833	2	Tetrad3_A
2013-05-15	1	5%Glu YPD	BY4742aux	Ral437	2013-05-06	120	8	17	25	133	0.18797	0.32	0.68	1.10833	2	Tetrad3_A
2013-05-15	1	5%Glu YPD	Tetrad3_A	Ral437	2013-05-06	120	17	16	33	133	0.24812	0.515152	0.484848	1.10833	2	Tetrad3_A
2013-05-15	1	5%Glu YPD	Tetrad3_A	Ral437	2013-05-06	120	23	29	52	133	0.390977	0.442308	0.557692	1.10833	2	Tetrad3_A
2013-05-15	2	5%Glu YPD	BY4742aux	Ral437	2013-05-06	125	8	8	16	132	0.121212	0.5	0.5	1.056	2	Tetrad3_B
2013-05-15	2	5%Glu YPD	BY4742aux	Ral437	2013-05-06	125	15	5	20	132	0.151515	0.75	0.25	1.056	2	Tetrad3_B
2013-05-15	2	5%Glu YPD	Tetrad3_B	Ral437	2013-05-06	125	23	27	50	132	0.378788	0.46	0.54	1.056	2	Tetrad3_B
2013-05-15	2	5%Glu YPD	Tetrad3_B	Ral437	2013-05-06	125	20	26	46	132	0.348485	0.434783	0.565217	1.056	2	Tetrad3_B
2013-05-15	3	5%Glu YPD	BY4742aux	Ral437	2013-05-06	120	3	8	11	108	0.101852	0.272727	0.727273	0.9	2	Tetrad3_C
2013-05-15	3	5%Glu YPD	BY4742aux	Ral437	2013-05-06	120	13	12	25	108	0.231481	0.52	0.48	0.9	2	Tetrad3_C
2013-05-15	3	5%Glu YPD	Tetrad3_C	Ral437	2013-05-06	120	12	21	33	108	0.305556	0.363636	0.636364	0.9	2	Tetrad3_C
2013-05-15	3	5%Glu YPD	Tetrad3_C	Ral437	2013-05-06	120	10	29	39	108	0.361111	0.25641	0.74359	0.9	2	Tetrad3_C
2013-05-15	4	5%Glu YPD	BY4742aux	Ral437	2013-05-06	123	5	5	10	120	0.0833333	0.5	0.5	0.97561	2	Tetrad3_D
2013-05-15	4	5%Glu YPD	BY4742aux	Ral437	2013-05-06	123	14	11	25	120	0.208333	0.56	0.44	0.97561	2	Tetrad3_D
2013-05-15	4	5%Glu YPD	Tetrad3_D	Ral437	2013-05-06	123	12	21	33	120	0.275	0.363636	0.636364	0.97561	2	Tetrad3_D
2013-05-15	4	5%Glu YPD	Tetrad3_D	Ral437	2013-05-06	123	26	26	52	120	0.433333	0.5	0.5	0.97561	2	Tetrad3_D
2013-05-16	1	5%Glu YPD	BY4742aux	Ral437	2013-05-08	120	6	8	14	119	0.117647	0.428571	0.571429	0.991667	2	BY4742aux
2013-05-16	1	5%Glu YPD	BY4742aux	Ral437	2013-05-08	120	21	14	35	119	0.294118	0.6	0.4	0.991667	2	BY4742aux
2013-05-16	1	5%Glu YPD	Tetrad3_A	Ral437	2013-05-08	120	23	16	39	119	0.327731	0.589744	0.410256	0.991667	2	BY4742aux
2013-05-16	1	5%Glu YPD	Tetrad3_A	Ral437	2013-05-08	120	15	16	31	119	0.260504	0.483871	0.516129	0.991667	2	BY4742aux
2013-05-16	2	5%Glu YPD	BY4742aux	Ral437	2013-05-07	125	18	11	29	117	0.247863	0.62069	0.37931	0.936	2	BY4742aux
2013-05-16	2	5%Glu YPD	BY4742aux	Ral437	2013-05-07	125	13	10	23	117	0.196581	0.565217	0.434783	0.936	2	BY4742aux
2013-05-16	2	5%Glu YPD	Tetrad3_B	Ral437	2013-05-07	125	13	16	29	117	0.247863	0.448276	0.551724	0.936	2	BY4742aux
2013-05-16	2	5%Glu YPD	Tetrad3_B	Ral437	2013-05-07	125	18	17	35	117	0.299145	0.514286	0.485714	0.936	2	BY4742aux
2013-05-16	3	5%Glu YPD	BY4742aux	Ral437	2013-05-09	120	19	13	32	122	0.262295	0.59375	0.40625	1.01667	2	BY4742aux
2013-05-16	3	5%Glu YPD	BY4742aux	Ral437	2013-05-09	120	7	11	18	122	0.147541	0.388889	0.611111	1.01667	2	BY4742aux
2013-05-16	3	5%Glu YPD	Tetrad3_C	Ral437	2013-05-09	120	28	20	48	122	0.393443	0.583333	0.416667	1.01667	2	BY4742aux
2013-05-16	3	5%Glu YPD	Tetrad3_C	Ral437	2013-05-09	120	8	16	24	122	0.196721	0.333333	0.666667	1.01667	2	BY4742aux
2013-05-16	4	5%Glu YPD	BY4742aux	Ral437	2013-05-10	123	12	4	16	118	0.135593	0.75	0.25	0.95935	2	BY4742aux
2013-05-16	4	5%Glu YPD	BY4742aux	Ral437	2013-05-10	123	5	9	14	118	0.118644	0.357143	0.642857	0.95935	2	BY4742aux
2013-05-16	4	5%Glu YPD	Tetrad3_D	Ral437	2013-05-10	123	33	26	59	118	0.5	0.559322	0.440678	0.95935	2	BY4742aux
2013-05-16	4	5%Glu YPD	Tetrad3_D	Ral437	2013-05-10	123	12	17	29	118	0.245763	0.413793	0.586207	0.95935	2	BY4742aux
2013-05-22	1	5%Glu YPD	BY4742aux	Ral437	2013-05-13	115	12	10	22	116	0.189655	0.545455	0.454545	1.0087	1	N/A
2013-05-22	1	5%Glu YPD	BY4742aux	Ral437	2013-05-13	115	13	13	26	116	0.224138	0.5	0.5	1.0087	1	N/A
2013-05-22	1	5%Glu YPD	Tetrad3_A	Ral437	2013-05-13	115	8	8	16	116	0.137931	0.5	0.5	1.0087	1	N/A
2013-05-22	1	5%Glu YPD	Tetrad3_A	Ral437	2013-05-13	115	22	30	52	116	0.448276	0.423077	0.576923	1.0087	1	N/A
2013-05-22	2	5%Glu YPD	BY4742aux	Ral437	2013-05-13	115	14	8	22	102	0.215686	0.636364	0.363636	0.886957	1	N/A
2013-05-22	2	5%Glu YPD	BY4742aux	Ral437	2013-05-13	115	2	6	8	102	0.0784314	0.25	0.75	0.886957	1	N/A
2013-05-22	2	5%Glu YPD	Tetrad3_B	Ral437	2013-05-13	115	8	15	23	102	0.22549	0.347826	0.652174	0.886957	1	N/A
2013-05-22	2	5%Glu YPD	Tetrad3_B	Ral437	2013-05-13	115	23	24	47	102	0.460784	0.489362	0.510638	0.886957	1	N/A
2013-05-22	3	5%Glu YPD	BY4742aux	Ral437	2013-05-13	112	7	3	10	111	0.0900901	0.7	0.3	0.991071	1	N/A
2013-05-22	3	5%Glu YPD	BY4742aux	Ral437	2013-05-13	112	13	9	22	111	0.198198	0.590909	0.409091	0.991071	1	N/A
2013-05-22	3	5%Glu YPD	Tetrad3_C	Ral437	2013-05-13	112	12	8	20	111	0.18018	0.6	0.4	0.991071	1	N/A
2013-05-22	3	5%Glu YPD	Tetrad3_C	Ral437	2013-05-13	112	34	25	59	111	0.531532	0.576271	0.423729	0.991071	1	N/A
2013-05-22	4	5%Glu YPD	BY4742aux	Ral437	2013-05-13	118	7	9	16	90	0.177778	0.4375	0.5625	0.762712	1	N/A
2013-05-22	4	5%Glu YPD	BY4742aux	Ral437	2013-05-13	118	10	6	16	90	0.177778	0.625	0.375	0.762712	1	N/A
2013-05-22	4	5%Glu YPD	Tetrad3_D	Ral437	2013-05-13	118	8	9	17	90	0.188889	0.470588	0.529412	0.762712	1	N/A
2013-05-22	4	5%Glu YPD	Tetrad3_D	Ral437	2013-05-13	118	24	25	49	90	0.544444	0.489796	0.510204	0.762712	1	N/A
2013-05-29	1	5%Glu YPD	BY4742aux	Ral437	2013-05-20	120	9	17	26	119	0.218487	0.346154	0.653846	0.991667	2	Tetrad4_A
2013-05-29	1	5%Glu YPD	BY4742aux	Ral437	2013-05-20	120	9	8	17	119	0.142857	0.529412	0.470588	0.991667	2	Tetrad4_A
2013-05-29	1	5%Glu YPD	Tetrad4_A	Ral437	2013-05-20	120	12	16	28	119	0.235294	0.428571	0.571429	0.991667	2	Tetrad4_A
2013-05-29	1	5%Glu YPD	Tetrad4_A	Ral437	2013-05-20	120	23	25	48	119	0.403361	0.479167	0.520833	0.991667	2	Tetrad4_A
2013-05-29	2	5%Glu YPD	BY4742aux	Ral437	2013-05-20	125	3	0	3	103	0.0291262	1	0	0.824	2	Tetrad4_B
2013-05-29	2	5%Glu YPD	BY4742aux	Ral437	2013-05-20	125	10	10	20	103	0.194175	0.5	0.5	0.824	2	Tetrad4_B
2013-05-29	2	5%Glu YPD	Tetrad4_B	Ral437	2013-05-20	125	22	15	37	103	0.359223	0.594595	0.405405	0.824	2	Tetrad4_B
2013-05-29	2	5%Glu YPD	Tetrad4_B	Ral437	2013-05-20	125	21	22	43	103	0.417476	0.488372	0.511628	0.824	2	Tetrad4_B
2013-05-29	3	5%Glu YPD	BY4742aux	Ral437	2013-05-22	113	3	1	4	99	0.040404	0.75	0.25	0.876106	2	Tetrad4_C
2013-05-29	3	5%Glu YPD	BY4742aux	Ral437	2013-05-22	113	3	0	3	99	0.030303	1	0	0.876106	2	Tetrad4_C
2013-05-29	3	5%Glu YPD	Tetrad4_C	Ral437	2013-05-22	113	23	20	43	99	0.434343	0.534884	0.465116	0.876106	2	Tetrad4_C
2013-05-29	3	5%Glu YPD	Tetrad4_C	Ral437	2013-05-22	113	22	27	49	99	0.494949	0.44898	0.55102	0.876106	2	Tetrad4_C
2013-05-29	4	5%Glu YPD	BY4742aux	Ral437	2013-05-20	121	0	1	1	115	0.00869565	0	1	0.950413	2	Tetrad4_D
2013-05-29	4	5%Glu YPD	BY4742aux	Ral437	2013-05-20	121	13	13	26	115	0.226087	0.5	0.5	0.950413	2	Tetrad4_D
2013-05-29	4	5%Glu YPD	Tetrad4_D	Ral437	2013-05-20	121	25	26	51	115	0.443478	0.490196	0.509804	0.950413	2	Tetrad4_D
2013-05-29	4	5%Glu YPD	Tetrad4_D	Ral437	2013-05-20	121	17	20	37	115	0.321739	0.459459	0.540541	0.950413	2	Tetrad4_D
2013-06-03	1	5%Glu YPD	BY4742aux	Ral437	2013-05-28	122	1	0	1	116	0.00862069	1	0	0.95082	2	BY4742aux
2013-06-03	1	5%Glu YPD	BY4742aux	Ral437	2013-05-28	122	27	27	54	116	0.465517	0.5	0.5	0.95082	2	BY4742aux
2013-06-03	1	5%Glu YPD	Tetrad4_A	Ral437	2013-05-28	122	1	0	1	116	0.00862069	1	0	0.95082	2	BY4742aux
2013-06-03	1	5%Glu YPD	Tetrad4_A	Ral437	2013-05-28	122	33	27	60	116	0.517241	0.55	0.45	0.95082	2	BY4742aux
2013-06-03	2	5%Glu YPD	BY4742aux	Ral437	2013-05-28	124	0	0	0	110	0	#DIV/0!	#DIV/0!	0.887097	2	BY4742aux
2013-06-03	2	5%Glu YPD	BY4742aux	Ral437	2013-05-28	124	6	4	10	110	0.0909091	0.6	0.4	0.887097	2	BY4742aux
2013-06-03	2	5%Glu YPD	Tetrad4_B	Ral437	2013-05-28	124	25	25	50	110	0.454545	0.5	0.5	0.887097	2	BY4742aux
2013-06-03	2	5%Glu YPD	Tetrad4_B	Ral437	2013-05-28	124	25	28	53	110	0.481818	0.471698	0.528302	0.887097	2	BY4742aux
2013-06-03	3	5%Glu YPD	BY4742aux	Ral437	2013-05-28	123	15	1	16	114	0.140351	0.9375	0.0625	0.926829	2	BY4742aux
2013-06-03	3	5%Glu YPD	BY4742aux	Ral437	2013-05-28	123	6	5	11	114	0.0964912	0.545455	0.454545	0.926829	2	BY4742aux
2013-06-03	3	5%Glu YPD	Tetrad4_C	Ral437	2013-05-28	123	22	20	42	114	0.368421	0.52381	0.47619	0.926829	2	BY4742aux
2013-06-03	3	5%Glu YPD	Tetrad4_C	Ral437	2013-05-28	123	27	18	45	114	0.394737	0.6	0.4	0.926829	2	BY4742aux
2013-06-03	4	5%Glu YPD	BY4742aux	Ral437	2013-05-30	108	9	4	13	101	0.128713	0.692308	0.307692	0.935185	2	BY4742aux
2013-06-03	4	5%Glu YPD	BY4742aux	Ral437	2013-05-30	108	14	12	26	101	0.257426	0.538462	0.461538	0.935185	2	BY4742aux
2013-06-03	4	5%Glu YPD	Tetrad4_D	Ral437	2013-05-30	108	16	10	26	101	0.257426	0.615385	0.384615	0.935185	2	BY4742aux
2013-06-03	4	5%Glu YPD	Tetrad4_D	Ral437	2013-05-30	108	23	13	36	101	0.356436	0.638889	0.361111	0.935185	2	BY4742aux
2013-06-07	1	5%Glu YPD	BY4742aux	Ral437	2013-06-02	118	8	10	18	110	0.163636	0.444444	0.555556	0.932203	1	N/A
2013-06-07	1	5%Glu YPD	BY4742aux	Ral437	2013-06-02	118	0	0	0	110	0	#DIV/0!	#DIV/0!	0.932203	1	N/A
2013-06-07	1	5%Glu YPD	Tetrad4_A	Ral437	2013-06-02	118	19	48	67	110	0.609091	0.283582	0.716418	0.932203	1	N/A
2013-06-07	1	5%Glu YPD	Tetrad4_A	Ral437	2013-06-02	118	11	14	25	110	0.227273	0.44	0.56	0.932203	1	N/A
2013-06-07	2	5%Glu YPD	BY4742aux	Ral437	2013-06-02	120	14	15	29	130	0.223077	0.482759	0.517241	1.08333	1	N/A
2013-06-07	2	5%Glu YPD	BY4742aux	Ral437	2013-06-02	120	20	10	30	130	0.230769	0.666667	0.333333	1.08333	1	N/A
2013-06-07	2	5%Glu YPD	Tetrad4_B	Ral437	2013-06-02	120	25	30	55	130	0.423077	0.454545	0.545455	1.08333	1	N/A
2013-06-07	2	5%Glu YPD	Tetrad4_B	Ral437	2013-06-02	120	4	12	16	130	0.123077	0.25	0.75	1.08333	1	N/A
2013-06-07	3	5%Glu YPD	BY4742aux	Ral437	2013-06-02	117	9	8	17	121	0.140496	0.529412	0.470588	1.03419	1	N/A
2013-06-07	3	5%Glu YPD	BY4742aux	Ral437	2013-06-02	117	5	2	7	121	0.0578512	0.714286	0.285714	1.03419	1	N/A
2013-06-07	3	5%Glu YPD	Tetrad4_C	Ral437	2013-06-02	117	23	27	50	121	0.413223	0.46	0.54	1.03419	1	N/A
2013-06-07	3	5%Glu YPD	Tetrad4_C	Ral437	2013-06-02	117	17	30	47	121	0.38843	0.361702	0.638298	1.03419	1	N/A
2013-06-07	4	5%Glu YPD	BY4742aux	Ral437	2013-06-02	118	5	5	10	128	0.078125	0.5	0.5	1.08475	1	N/A
2013-06-07	4	5%Glu YPD	BY4742aux	Ral437	2013-06-02	118	9	3	12	128	0.09375	0.75	0.25	1.08475	1	N/A
2013-06-07	4	5%Glu YPD	Tetrad4_D	Ral437	2013-06-02	118	25	22	47	128	0.367188	0.531915	0.468085	1.08475	1	N/A
2013-06-07	4	5%Glu YPD	Tetrad4_D	Ral437	2013-06-02	118	34	25	59	128	0.460938	0.576271	0.423729	1.08475	1	N/A
2014-02-07	1	5%Glu YPD	Tetrad18_C	Ral437	2014-02-03	120	20	19	39	118	0.330508	0.512821	0.487179	0.983333	1	N/A
2014-02-07	1	5%Glu YPD	Tetrad18_C	Ral437	2014-02-03	120	12	16	28	118	0.237288	0.428571	0.571429	0.983333	1	N/A
2014-02-07	1	5%Glu YPD	BY4742aux	Ral437	2014-02-03	120	7	20	27	118	0.228814	0.259259	0.740741	0.983333	1	N/A
2014-02-07	1	5%Glu YPD	BY4742aux	Ral437	2014-02-03	120	10	14	24	118	0.20339	0.416667	0.583333	0.983333	1	N/A
2014-02-07	2	5%Glu YPD	Tetrad18_D	Ral437	2014-02-01	120	17	21	38	118	0.322034	0.447368	0.552632	0.983333	1	N/A
2014-02-07	2	5%Glu YPD	Tetrad18_D	Ral437	2014-02-01	120	24	20	44	118	0.372881	0.545455	0.454545	0.983333	1	N/A
2014-02-07	2	5%Glu YPD	BY4742aux	Ral437	2014-02-01	120	13	3	16	118	0.135593	0.8125	0.1875	0.983333	1	N/A
2014-02-07	2	5%Glu YPD	BY4742aux	Ral437	2014-02-01	120	9	11	20	118	0.169492	0.45	0.55	0.983333	1	N/A
2014-02-11	1	5%Glu YPD	BY4742aux	Ral437	2014-02-05	120	12	9	21	118	0.177966	0.571429	0.428571	0.983333	1	N/A
2014-02-11	1	5%Glu YPD	BY4742aux	Ral437	2014-02-05	120	18	9	27	118	0.228814	0.666667	0.333333	0.983333	1	N/A
2014-02-11	1	5%Glu YPD	Tetrad18_B	Ral437	2014-02-05	120	13	23	36	118	0.305085	0.361111	0.638889	0.983333	1	N/A
2014-02-11	1	5%Glu YPD	Tetrad18_B	Ral437	2014-02-05	120	33	12	45	118	0.381356	0.733333	0.266667	0.983333	1	N/A
2014-02-11	2	5%Glu YPD	BY4742aux	Ral437	2014-02-03	120	3	9	12	114	0.105263	0.25	0.75	0.95	1	N/A
2014-02-11	2	5%Glu YPD	BY4742aux	Ral437	2014-02-03	120	13	13	26	114	0.22807	0.5	0.5	0.95	1	N/A
2014-02-11	2	5%Glu YPD	Tetrad18_C	Ral437	2014-02-03	120	30	27	57	114	0.5	0.526316	0.473684	0.95	1	N/A
2014-02-11	2	5%Glu YPD	Tetrad18_C	Ral437	2014-02-03	120	12	7	19	114	0.166667	0.631579	0.368421	0.95	1	N/A
2014-02-11	3	5%Glu YPD	BY4742aux	Ral437	2014-02-03	120	9	4	13	117	0.111111	0.692308	0.307692	0.975	1	N/A
2014-02-11	3	5%Glu YPD	BY4742aux	Ral437	2014-02-03	120	14	4	18	117	0.153846	0.777778	0.222222	0.975	1	N/A
2014-02-11	3	5%Glu YPD	Tetrad18_D	Ral437	2014-02-03	120	21	30	51	117	0.435897	0.411765	0.588235	0.975	1	N/A
2014-02-11	3	5%Glu YPD	Tetrad18_D	Ral437	2014-02-03	120	19	16	35	117	0.299145	0.542857	0.457143	0.975	1	N/A
2014-02-11	4	5%Glu YPD	BY4742aux	Ral437	2014-02-03	120	13	8	21	114	0.184211	0.619048	0.380952	0.95	1	N/A
2014-02-11	4	5%Glu YPD	BY4742aux	Ral437	2014-02-03	120	15	10	25	114	0.219298	0.6	0.4	0.95	1	N/A
2014-02-11	4	5%Glu YPD	Tetrad18_A	Ral437	2014-02-03	120	0	7	7	114	0.0614035	0	1	0.95	1	N/A
2014-02-11	4	5%Glu YPD	Tetrad18_A	Ral437	2014-02-03	120	31	30	61	114	0.535088	0.508197	0.491803	0.95	1	N/A
2014-02-11	5	5%Glu YPD	Tetrad18_A	Ral437	2014-02-04	120	20	23	43	115	0.373913	0.465116	0.534884	0.958333	1	N/A
2014-02-11	5	5%Glu YPD	Tetrad18_A	Ral437	2014-02-04	120	18	17	35	115	0.304348	0.514286	0.485714	0.958333	1	N/A
2014-02-11	5	5%Glu YPD	BY4742aux	Ral437	2014-02-04	120	7	5	12	115	0.104348	0.583333	0.416667	0.958333	1	N/A
2014-02-11	5	5%Glu YPD	BY4742aux	Ral437	2014-02-04	120	13	12	25	115	0.217391	0.52	0.48	0.958333	1	N/A
2014-02-14	1	5%Glu YPD	Tetrad18_B	Ral437	2014-02-05	120	20	17	37	113	0.327434	0.540541	0.459459	0.941667	1	N/A
2014-02-14	1	5%Glu YPD	Tetrad18_B	Ral437	2014-02-05	120	33	26	59	113	0.522124	0.559322	0.440678	0.941667	1	N/A
2014-02-14	1	5%Glu YPD	BY4742aux	Ral437	2014-02-05	120	3	0	3	113	0.0265487	1	0	0.941667	1	N/A
2014-02-14	1	5%Glu YPD	BY4742aux	Ral437	2014-02-05	120	11	3	14	113	0.123894	0.785714	0.214286	0.941667	1	N/A

## Sheet: 42_v_Tet_mat
Strain	FlyLine	Count	Total	Attractiveness	Percentage Caught	Met15	Lys2	Mating Type	Tetrad	Segregant	Trap Type	4142ornot
BY4742aux_1_A	Ral 437	33	106	0.31	0.82	+	-	alpha	1	A	42T	42
BY4742aux_1_A	Ral 437	34	66	0.52	0.81	+	-	alpha	1	A	42T	42
BY4742aux_1_A	Ral 437	27	93	0.29	0.74	+	-	alpha	1	A	42T	42
BY4742aux_1_B	Ral 437	19	109	0.17	0.78	+	-	alpha	1	B	42T	42
BY4742aux_1_B	Ral 437	26	87	0.3	0.7	+	-	alpha	1	B	42T	42
BY4742aux_1_B	Ral 437	20	94	0.21	0.72	+	-	alpha	1	B	42T	42
BY4742aux_1_C	Ral 437	25	116	0.22	0.89	+	-	alpha	1	C	42T	42
BY4742aux_1_C	Ral 437	36	71	0.51	0.55	+	+	alpha	1	C	42T	42
BY4742aux_1_C	Ral 437	36	78	0.46	0.62	+	+	alpha	1	C	42T	42
BY4742aux_1_D	Ral 437	25	117	0.21	0.89	+	-	alpha	1	D	42T	42
BY4742aux_1_D	Ral 437	36	88	0.41	0.69	+	-	alpha	1	D	42T	42
BY4742aux_1_D	Ral 437	32	84	0.38	0.69	+	-	alpha	1	D	42T	42
BY4742aux_10_A	Ral 437	24	113	0.21	0.8	+	-	alpha	10	A	42T	42
BY4742aux_10_A	Ral 437	53	110	0.48	0.87	+	-	alpha	10	A	42T	42
BY4742aux_10_A	Ral 437	25	116	0.22	0.93	+	-	alpha	10	A	42T	42
BY4742aux_10_B	Ral 437	17	108	0.16	0.77	+	-	alpha	10	B	42T	42
BY4742aux_10_B	Ral 437	61	98	0.62	0.73	+	-	alpha	10	B	42T	42
BY4742aux_10_B	Ral 437	42	82	0.51	0.7	+	-	alpha	10	B	42T	42
BY4742aux_10_C	Ral 437	33	127	0.26	0.88	+	-	alpha	10	C	42T	42
BY4742aux_10_C	Ral 437	66	107	0.62	0.86	+	-	alpha	10	C	42T	42
BY4742aux_10_C	Ral 437	38	120	0.32	0.94	+	-	alpha	10	C	42T	42
BY4742aux_10_D	Ral 437	39	133	0.29	0.88	+	-	alpha	10	D	42T	42
BY4742aux_10_D	Ral 437	48	102	0.47	0.82	+	-	alpha	10	D	42T	42
BY4742aux_10_D	Ral 437	40	117	0.34	0.93	+	-	alpha	10	D	42T	42
BY4742aux_18_A	Ral 437	26	81	0.32	0.68	+	-	alpha	18	A	42T	42
BY4742aux_18_A	Ral 437	42	113	0.37	0.91	+	-	alpha	18	A	42T	42
BY4742aux_18_A	Ral 437	32	115	0.28	0.98	+	-	alpha	18	A	42T	42
BY4742aux_18_B	Ral 437	23	56	0.41	0.51	+	-	alpha	18	B	42T	42
BY4742aux_18_B	Ral 437	52	111	0.47	0.9	+	-	alpha	18	B	42T	42
BY4742aux_18_B	Ral 437	25	119	0.21	0.98	+	-	alpha	18	B	42T	42
BY4742aux_18_C	Ral 437	22	99	0.22	0.79	+	-	alpha	18	C	42T	42
BY4742aux_18_C	Ral 437	69	103	0.67	0.86	+	-	alpha	18	C	42T	42
BY4742aux_18_C	Ral 437	11	119	0.09	0.94	+	-	alpha	18	C	42T	42
BY4742aux_18_D	Ral 437	37	98	0.38	0.78	+	-	alpha	18	D	42T	42
BY4742aux_18_D	Ral 437	71	103	0.69	0.86	+	-	alpha	18	D	42T	42
BY4742aux_18_D	Ral 437	42	108	0.39	0.86	+	-	alpha	18	D	42T	42
Tetrad1_A	Ral 437	73	106	0.69	0.82	-	-	alpha	1	A	1A	1
Tetrad1_A	Ral 437	32	66	0.48	0.81	-	-	alpha	1	A	1A	1
Tetrad1_A	Ral 437	66	93	0.71	0.74	-	-	alpha	1	A	1A	1
Tetrad1_B	Ral 437	90	109	0.83	0.78	-	+	alpha	1	B	1B	1
Tetrad1_B	Ral 437	61	87	0.7	0.7	-	+	alpha	1	B	1B	1
Tetrad1_B	Ral 437	74	94	0.79	0.72	-	+	alpha	1	B	1B	1
Tetrad1_C	Ral 437	91	116	0.78	0.89	+	+	a	1	C	1C	1
Tetrad1_C	Ral 437	35	71	0.49	0.55	+	-	alpha	1	C	1C	1
Tetrad1_C	Ral 437	42	78	0.54	0.62	+	-	alpha	1	C	1C	1
Tetrad1_D	Ral 437	92	117	0.79	0.89	+	-	a	1	D	1D	1
Tetrad1_D	Ral 437	52	88	0.59	0.69	+	-	a	1	D	1D	1
Tetrad1_D	Ral 437	52	84	0.62	0.69	+	-	a	1	D	1D	1
Tetrad10_A	Ral 437	89	113	0.79	0.8	-	-	a	10	A	10A	1
Tetrad10_A	Ral 437	57	110	0.52	0.87	-	-	a	10	A	10A	1
Tetrad10_A	Ral 437	91	116	0.78	0.93	-	-	a	10	A	10A	1
Tetrad10_B	Ral 437	91	108	0.84	0.77	+	+	alpha	10	B	10B	1
Tetrad10_B	Ral 437	37	98	0.38	0.73	+	+	alpha	10	B	10B	1
Tetrad10_B	Ral 437	40	82	0.49	0.7	+	+	alpha	10	B	10B	1
Tetrad10_C	Ral 437	94	127	0.74	0.88	+	-	a	10	C	10C	1
Tetrad10_C	Ral 437	41	107	0.38	0.86	+	-	a	10	C	10C	1
Tetrad10_C	Ral 437	82	120	0.68	0.94	+	-	a	10	C	10C	1
Tetrad10_D	Ral 437	94	133	0.71	0.88	-	+	alpha	10	D	10D	1
Tetrad10_D	Ral 437	54	102	0.53	0.82	-	+	alpha	10	D	10D	1
Tetrad10_D	Ral 437	77	117	0.66	0.93	-	+	alpha	10	D	10D	1
Tetrad18_A	Ral 437	55	81	0.68	0.68	-	-	a	18	A	18A	1
Tetrad18_A	Ral 437	71	113	0.63	0.91	-	-	a	18	A	18A	1
Tetrad18_A	Ral 437	83	115	0.72	0.98	-	-	a	18	A	18A	1
Tetrad18_B	Ral 437	33	56	0.59	0.51	-	-	alpha	18	B	18B	1
Tetrad18_B	Ral 437	59	111	0.53	0.9	-	-	alpha	18	B	18B	1
Tetrad18_B	Ral 437	94	119	0.79	0.98	-	-	alpha	18	B	18B	1
Tetrad18_C	Ral 437	77	99	0.78	0.79	+	+	a	18	C	18C	1
Tetrad18_C	Ral 437	34	103	0.33	0.86	+	+	a	18	C	18C	1
Tetrad18_C	Ral 437	108	119	0.91	0.94	+	+	a	18	C	18C	1
Tetrad18_D	Ral 437	61	98	0.62	0.78	+	+	alpha	18	D	18D	1
Tetrad18_D	Ral 437	32	103	0.31	0.86	+	+	alpha	18	D	18D	1
Tetrad18_D	Ral 437	66	108	0.61	0.86	+	+	alpha	18	D	18D	1
BY4741aux	Ral 437	46	72	0.64	0.72	-	+	a	0	N	41	41
BY4742aux	Ral 437	26	72	0.36	0.72	+	-	alpha	0	N	42	42
BY4741aux	Ral 437	48	85	0.56	0.77	-	+	a	0	N	41	41
BY4742aux	Ral 437	37	85	0.44	0.77	+	-	alpha	0	N	42	42
BY4741aux	Ral 437	82	116	0.71	0.8	-	+	a	0	N	41	41
BY4742aux	Ral 437	34	116	0.29	0.8	+	-	alpha	0	N	42	42
BY4741aux	Ral 437	114	154	0.74	0.85	-	+	a	0	N	41	41
BY4742aux	Ral 437	40	154	0.26	0.85	+	-	alpha	0	N	42	42
BY4741aux	Ral 437	75	99	0.76	0.94	-	+	a	0	N	41	41
BY4742aux	Ral 437	24	99	0.23	0.94	+	-	alpha	0	N	42	42
BY4741aux	Ral 437	66	96	0.69	0.96	-	+	a	0	N	41	41
BY4742aux	Ral 437	30	96	0.31	0.96	+	-	alpha	0	N	42	42
BY4741aux	Ral 437	57	93	0.61	1	-	+	a	0	N	41	41
BY4741aux	Ral 437	67	98	0.69	1	-	+	a	0	N	41	42
BY4742aux	Ral 437	36	93	0.39	1	+	-	alpha	0	N	42	41
BY4742aux	Ral 437	31	98	0.31	1	+	-	alpha	0	N	42	42
BY4742aux	Ral 437	46	126	0.37	1.01	+	-	alpha	0	N	42	42
BY4741aux	Ral 437	80	126	0.63	1.05	-	+	a	0	N	41	41
BY4741aux	Ral 437	87	112	0.78	1.17	-	+	a	0	N	41	41
BY4742aux	Ral 437	25	112	0.22	1.17	+	-	alpha	0	N	42	42
BY4741aux	Ral 437	81	116	0.7	1.1	-	+	a	0	N	41	41
BY4742aux	Ral 437	35	116	0.3	1.1	+	-	alpha	0	N	42	42
BY4741aux	Ral 437	93	134	0.69	1.02	-	+	a	0	N	41	41
BY4742aux	Ral 437	41	134	0.31	1.02	+	-	alpha	0	N	42	42
BY4741aux	Ral 437	77	125	0.62	1.02	-	+	a	0	N	41	41
BY4742aux	Ral 437	48	125	0.38	1.02	+	-	alpha	0	N	42	42
BY4741aux	Ral 437	139	152	0.91	1.03	-	+	a	0	N	41	41
BY4742aux	Ral 437	13	152	0.09	1.03	+	-	alpha	0	N	42	42
BY4741aux	Ral 437	81	153	0.53	1.09	-	+	a	0	N	41	41
BY4742aux	Ral 437	72	153	0.47	1.09	+	-	alpha	0	N	42	42
BY4742aux_3_A	Ral 437	38	133	0.29	1.11	+	-	alpha	3	A	42T	42
BY4742aux_3_A	Ral 437	49	119	0.41	0.99	+	-	alpha	3	A	42T	42
BY4742aux_3_A	Ral 437	48	116	0.41	1.01	+	-	alpha	3	A	42T	42
BY4742aux_3_B	Ral 437	36	132	0.27	1.06	+	-	alpha	3	B	42T	42
BY4742aux_3_B	Ral 437	52	117	0.44	0.94	+	-	alpha	3	B	42T	42
BY4742aux_3_B	Ral 437	30	102	0.29	0.89	+	-	alpha	3	B	42T	42
BY4742aux_3_C	Ral 437	36	108	0.33	0.9	+	-	alpha	3	C	42T	42
BY4742aux_3_C	Ral 437	50	122	0.41	1.02	+	-	alpha	3	C	42T	42
BY4742aux_3_C	Ral 437	32	111	0.29	0.99	+	-	alpha	3	C	42T	42
BY4742aux_3_D	Ral 437	35	120	0.29	0.98	+	-	alpha	3	D	42T	42
BY4742aux_3_D	Ral 437	30	118	0.25	0.96	+	-	alpha	3	D	42T	42
BY4742aux_3_D	Ral 437	32	90	0.36	0.93	+	-	alpha	3	D	42T	42
Tetrad3_A	Ral 437	85	133	0.64	1.11	+	-	alpha	3	A	3A	1
Tetrad3_A	Ral 437	70	119	0.59	0.99	+	-	alpha	3	A	3A	1
Tetrad3_A	Ral 437	68	116	0.59	1.01	+	-	alpha	3	A	3A	1
Tetrad3_B	Ral 437	96	132	0.73	1.06	-	+	a	3	B	3B	1
Tetrad3_B	Ral 437	64	117	0.55	0.94	-	+	a	3	B	3B	1
Tetrad3_B	Ral 437	70	102	0.69	0.89	-	+	a	3	B	3B	1
Tetrad3_C	Ral 437	72	108	0.67	0.9	+	-	alpha	3	C	3C	1
Tetrad3_C	Ral 437	72	122	0.59	1.02	+	-	alpha	3	C	3C	1
Tetrad3_C	Ral 437	79	111	0.71	0.99	+	-	alpha	3	C	3C	1
Tetrad3_D	Ral 437	85	120	0.71	0.98	-	+	a	3	D	3D	1
Tetrad3_D	Ral 437	88	118	0.75	0.96	-	+	a	3	D	3D	1
Tetrad3_D	Ral 437	66	90	0.73	0.93	-	+	a	3	D	3D	1
BY4742aux_4_A	Ral 437	43	119	0.36	1.01	+	-	alpha	4	A	42T	42
BY4742aux_4_B	Ral 437	23	103	0.22	0.87	+	-	alpha	4	B	42T	42
BY4742aux_4_C	Ral 437	7	99	0.07	0.91	+	-	alpha	4	C	42T	42
BY4742aux_4_D	Ral 437	27	115	0.23	0.93	+	-	alpha	4	D	42T	42
Tetrad4_A	Ral 437	76	119	0.64	1.01	+	+	a	4	A	4A	1
Tetrad4_B	Ral 437	80	103	0.78	0.87	-	-	alpha	4	B	4B	1
Tetrad4_C	Ral 437	92	99	0.93	0.91	-	+	a	4	C	4C	1
Tetrad4_D	Ral 437	88	115	0.77	0.93	+	-	alpha	4	D	4D	1
BY4742aux_4_A	Ral 437	55	116	0.47	0.95	+	-	alpha	4	A	42T	42
BY4742aux_4_B	Ral 437	10	110	0.09	0.89	+	-	alpha	4	B	42T	42
BY4742aux_4_C	Ral 437	27	114	0.24	0.93	+	-	alpha	4	C	42T	42
BY4742aux_4_D	Ral 437	39	101	0.39	0.94	+	-	alpha	4	D	42T	42
Tetrad4_A	Ral 437	61	116	0.53	0.95	+	+	a	4	A	4A	1
Tetrad4_B	Ral 437	100	110	0.91	0.89	-	-	alpha	4	B	4B	1
Tetrad4_C	Ral 437	87	114	0.76	0.93	-	+	a	4	C	4C	1
Tetrad4_D	Ral 437	62	101	0.61	0.94	+	-	alpha	4	D	4D	1
BY4742aux_4_A	Ral 437	18	110	0.16	0.93	+	-	alpha	4	A	42T	42
BY4742aux_4_B	Ral 437	59	130	0.45	1.08	+	-	alpha	4	B	42T	42
BY4742aux_4_C	Ral 437	24	121	0.2	1.03	+	-	alpha	4	C	42T	42
BY4742aux_4_D	Ral 437	22	128	0.17	1.08	+	-	alpha	4	D	42T	42
Tetrad4_A	Ral 437	92	110	0.84	0.93	+	+	a	4	A	4A	1
Tetrad4_B	Ral 437	71	130	0.55	1.08	-	-	alpha	4	B	4B	1
Tetrad4_C	Ral 437	97	121	0.8	1.03	-	+	a	4	C	4C	1
Tetrad4_D	Ral 437	106	128	0.83	1.08	+	-	alpha	4	D	4D	1

## Sheet: Controls
Date Counted	Trial	Media	Yeast	Fly Line	1 day old date(of youngest)	# of flies	Female	Male	Total	Total Caught	Percentage Caught	Percetage Female	Percentage Male	Percentage Flies Trapped	Trap Orientation	Near Light
2013-06-13	1	5%Glu YPD	BY4741aux	Ral 437	2013-06-04	120	12	10	22	123	0.178862	0.545455	0.454545	1.025	1	BY4741aux
2013-06-13	1	5%Glu YPD	BY4741aux	Ral 437	2013-06-04	120	11	8	19	123	0.154472	0.578947	0.421053	1.025	1	BY4741aux
2013-06-13	1	5%Glu YPD	BY4741prot	Ral 437	2013-06-04	120	18	23	41	123	0.333333	0.439024	0.560976	1.025	1	BY4741aux
2013-06-13	1	5%Glu YPD	BY4741prot	Ral 437	2013-06-04	120	22	19	41	123	0.333333	0.536585	0.463415	1.025	1	BY4741aux
2013-06-13	2	5%Glu YPD	BY4741aux	Ral 437	2013-06-04	120	9	10	19	117	0.162393	0.473684	0.526316	0.975	1	BY4741aux
2013-06-13	2	5%Glu YPD	BY4741aux	Ral 437	2013-06-04	120	9	8	17	117	0.145299	0.529412	0.470588	0.975	1	BY4741aux
2013-06-13	2	5%Glu YPD	BY4741prot	Ral 437	2013-06-04	120	17	10	27	117	0.230769	0.62963	0.37037	0.975	1	BY4741aux
2013-06-13	2	5%Glu YPD	BY4741prot	Ral 437	2013-06-04	120	22	32	54	117	0.461538	0.407407	0.592593	0.975	1	BY4741aux
2013-06-19	3	5%Glu YPD	BY4741aux	Ral 437	2013-06-10	121	17	24	41	113	0.362832	0.414634	0.585366	0.933884	2	BY4741aux
2013-06-19	3	5%Glu YPD	BY4741aux	Ral 437	2013-06-10	121	11	22	33	113	0.292035	0.333333	0.666667	0.933884	2	BY4741aux
2013-06-19	3	5%Glu YPD	BY4741prot	Ral 437	2013-06-10	121	7	11	18	113	0.159292	0.388889	0.611111	0.933884	2	BY4741aux
2013-06-19	3	5%Glu YPD	BY4741prot	Ral 437	2013-06-10	121	12	9	21	113	0.185841	0.571429	0.428571	0.933884	2	BY4741aux
2013-06-19	4	5%Glu YPD	BY4741aux	Ral 437	2013-06-07	122	5	5	10	111	0.0900901	0.5	0.5	0.909836	2	BY4741prot
2013-06-19	4	5%Glu YPD	BY4741aux	Ral 437	2013-06-07	122	12	13	25	111	0.225225	0.48	0.52	0.909836	2	BY4741prot
2013-06-19	4	5%Glu YPD	BY4741prot	Ral 437	2013-06-07	122	19	23	42	111	0.378378	0.452381	0.547619	0.909836	2	BY4741prot
2013-06-19	4	5%Glu YPD	BY4741prot	Ral 437	2013-06-07	122	19	15	34	111	0.306306	0.558824	0.441176	0.909836	2	BY4741prot
2013-06-19	1	5%Glu YPD	BY4742aux	Ral 437	2013-06-10	123	11	11	22	126	0.174603	0.5	0.5	1.02439	2	BY4742aux
2013-06-19	1	5%Glu YPD	BY4742aux	Ral 437	2013-06-10	123	7	4	11	126	0.0873016	0.636364	0.363636	1.02439	2	BY4742aux
2013-06-19	1	5%Glu YPD	BY4741prot	Ral 437	2013-06-10	123	26	12	38	126	0.301587	0.684211	0.315789	1.02439	2	BY4742aux
2013-06-19	1	5%Glu YPD	BY4741prot	Ral 437	2013-06-10	123	20	22	42	126	0.333333	0.47619	0.52381	1.02439	2	BY4742aux
2013-06-19	2	5%Glu YPD	BY4742aux	Ral 437	2013-06-10	121	5	8	13	111	0.117117	0.384615	0.615385	0.917355	2	BY4741prot
2013-06-19	2	5%Glu YPD	BY4742aux	Ral 437	2013-06-10	121	16	15	31	111	0.279279	0.516129	0.483871	0.917355	2	BY4741prot
2013-06-19	2	5%Glu YPD	BY4741prot	Ral 437	2013-06-10	121	30	26	56	111	0.504505	0.535714	0.464286	0.917355	2	BY4741prot
2013-06-19	2	5%Glu YPD	BY4741prot	Ral 437	2013-06-10	121	6	5	11	111	0.0990991	0.545455	0.454545	0.917355	2	BY4741prot

## Sheet: Controls_B
Date Counted	Media	Yeast	Fly Line	Hatch date	Male	Female	Total	Total Caught	Orentaition	Near Light
2013-06-26	5% YPD	JRY	Ral 437	2013-06-17	5	4	9	107	Diamond	n/a
2013-06-26	5% YPD	41aux	Ral 437	2013-06-17	25	18	43	107	Diamond	n/a
2013-06-26	5% YPD	JRY	Ral 437	2013-06-17	13	19	32	107	Diamond	n/a
2013-06-26	5% YPD	41aux	Ral 437	2013-06-17	10	13	23	107	Diamond	n/a
2013-07-09	5% YPD	JRY	Ral437	2013-06-27	29	19	48	97	Diamond	n/a
2013-07-09	5% YPD	JRY	Ral437	2013-06-27	10	2	12	97	Diamond	n/a
2013-07-09	5% YPD	42aux	Ral437	2013-06-27	2	5	7	97	Diamond	n/a
2013-07-09	5% YPD	42aux	Ral437	2013-06-27	16	14	30	97	Diamond	n/a
2013-07-09	5% YPD	JRY	Ral437	2013-06-27	21	17	38	107	2x2	n
2013-07-09	5% YPD	JRY	Ral437	2013-06-27	22	16	38	107	2x2	n
2013-07-09	5% YPD	42aux	Ral437	2013-06-27	11	7	18	107	2x2	y
2013-07-09	5% YPD	42aux	Ral437	2013-06-27	5	8	13	107	2x2	y
2013-07-09	5% YPD	42aux	Ral437	2013-06-27	6	11	17	87	2x2	n
2013-07-09	5% YPD	42aux	Ral437	2013-06-27	5	3	8	87	2x2	n
2013-07-09	5% YPD	JRY	Ral437	2013-06-27	6	3	18	87	2x2	y
2013-07-09	5% YPD	JRY	Ral437	2013-06-27	23	21	44	87	2x2	y
2013-07-10	5% YPD	JRY	Ral437	2013-07-01	6	9	15	95	Diamond	n/a
2013-07-10	5% YPD	JRY	Ral437	2013-07-01	16	12	28	95	Diamond	n/a
2013-07-10	5% YPD	41aux	Ral437	2013-07-01	9	11	18	95	Diamond	n/a
2013-07-10	5% YPD	41aux	Ral437	2013-07-01	9	25	34	95	Diamond	n/a
2013-07-10	5% YPD	JRY	Ral437	2013-07-01	7	17	26	110	Diamond	n/a
2013-07-10	5% YPD	JRY	Ral437	2013-07-01	21	11	32	110	Diamond	n/a
2013-07-10	5% YPD	41aux	Ral437	2013-07-01	12	8	20	110	Diamond	n/a
2013-07-10	5% YPD	41aux	Ral437	2013-07-01	18	14	32	110	Diamond	n/a
2013-07-18	5% YPD	JRY	Ral437	2013-07-12	23	36	59	105	2x2	n
2013-07-18	5% YPD	JRY	Ral437	2013-07-12	7	17	25	105	2x2	n
2013-07-18	5% YPD	42aux	Ral437	2013-07-12	3	1	4	105	2x2	y
2013-07-18	5% YPD	42aux	Ral437	2013-07-12	14	3	17	105	2x2	y
2013-07-18	5% YPD	42aux	Ral437	2013-07-12	3	7	10	112	2x2	n
2013-07-18	5% YPD	42aux	Ral437	2013-07-12	7	5	12	112	2x2	n
2013-07-18	5% YPD	JRY	Ral437	2013-07-12	30	25	55	112	2x2	y
2013-07-18	5% YPD	JRY	Ral437	2013-07-12	17	18	35	112	2x2	y
2013-07-18	5% YPD	JRY	Ral437	2013-07-12	11	8	19	106	Diamond	n/a
2013-07-18	5% YPD	JRY	Ral437	2013-07-12	17	25	42	106	Diamond	n/a
2013-07-18	5% YPD	42aux	Ral437	2013-07-12	11	9	20	106	Diamond	n/a
2013-07-18	5% YPD	42aux	Ral437	2013-07-12	10	15	25	106	Diamond	n/a
2013-07-23	5% YPD	JRY	Ral437	2013-07-15	14	15	29	111	Diamond	n/a
2013-07-23	5% YPD	JRY	Ral437	2013-07-15	17	23	40	111	Diamond	n/a
2013-07-23	5% YPD	42aux	Ral437	2013-07-15	14	12	26	111	Diamond	n/a
2013-07-23	5% YPD	42aux	Ral437	2013-07-15	10	9	19	111	Diamond	n/a
2013-07-23	5% YPD	JRY	Ral437	2013-07-15	16	17	33	113	Diamond	n/a
2013-07-23	5% YPD	JRY	Ral437	2013-07-15	18	22	40	113	Diamond	n/a
2013-07-23	5% YPD	42aux	Ral437	2013-07-15	10	16	26	113	Diamond	n/a
2013-07-23	5% YPD	42aux	Ral437	2013-07-15	12	6	18	113	Diamond	n/a
2013-07-23	5% YPD	42aux	Ral437	2013-07-15	7	13	20	114	Diamond	n/a
2013-07-23	5% YPD	42aux	Ral437	2013-07-15	10	8	18	114	Diamond	n/a
2013-07-23	5% YPD	JRY	Ral437	2013-07-15	19	13	32	114	Diamond	n/a
2013-07-23	5% YPD	JRY	Ral437	2013-07-15	30	14	44	114	Diamond	n/a
2013-07-24	5% YPD	41aux	Ral437	2013-07-15	14	8	22	112	2x2	n
2013-07-24	5% YPD	41aux	Ral437	2013-07-15	23	30	50	112	2x2	n
2013-07-24	5% YPD	42aux	Ral437	2013-07-15	9	9	18	112	2x2	y
2013-07-24	5% YPD	42aux	Ral437	2013-07-15	9	10	19	112	2x2	y
2013-07-24	5% YPD	42aux	Ral437	2013-07-15	3	10	13	113	2x2	n
2013-07-24	5% YPD	42aux	Ral437	2013-07-15	11	8	19	113	2x2	n
2013-07-24	5% YPD	41aux	Ral437	2013-07-15	14	8	22	113	2x2	y
2013-07-24	5% YPD	41aux	Ral437	2013-07-15	25	34	59	113	2x2	y
2013-07-24	5% YPD	41aux	Ral437	2013-07-15	12	28	40	120	Diamond	n/a
2013-07-24	5% YPD	41aux	Ral437	2013-07-15	30	26	56	120	Diamond	n/a
2013-07-24	5% YPD	42aux	Ral437	2013-07-15	4	10	14	120	Diamond	n/a
2013-07-24	5% YPD	42aux	Ral437	2013-07-15	4	6	10	120	Diamond	n/a
2013-07-25	5% YPD	41aux	Ral437	2013-07-16	12	8	20	111	2x2	n
2013-07-25	5% YPD	41aux	Ral437	2013-07-16	7	14	21	111	2x2	n
2013-07-25	5% YPD	JRY	Ral437	2013-07-16	17	12	29	111	2x2	y
2013-07-25	5% YPD	JRY	Ral437	2013-07-16	13	28	41	111	2x2	y
2013-07-25	5% YPD	JRY	Ral437	2013-07-16	13	8	21	123	2x2	n
2013-07-25	5% YPD	JRY	Ral437	2013-07-16	5	2	7	123	2x2	n
2013-07-25	5% YPD	41aux	Ral437	2013-07-16	30	23	53	123	2x2	y
2013-07-25	5% YPD	41aux	Ral437	2013-07-16	25	17	42	123	2x2	y
2013-07-25	5% YPD	JRY	Ral437	2013-07-16	8	18	26	114	Diamond	n/a
2013-07-25	5% YPD	JRY	Ral437	2013-07-16	18	9	27	114	Diamond	n/a
2013-07-25	5% YPD	41aux	Ral437	2013-07-16	18	11	29	114	Diamond	n/a
2013-07-25	5% YPD	41aux	Ral437	2013-07-16	14	16	30	114	Diamond	n/a
2013-07-31	5% YPD	JRY	Ral437	2013-07-22	7	12	19	105	2x2	n
2013-07-31	5% YPD	JRY	Ral437	2013-07-22	22	13	35	105	2x2	n
2013-07-31	5% YPD	41aux	Ral437	2013-07-22	15	15	30	105	2x2	y
2013-07-31	5% YPD	41aux	Ral437	2013-07-22	15	6	21	105	2x2	y
2013-07-31	5% YPD	41aux	Ral437	2013-07-22	12	8	20	122	2x2	n
2013-07-31	5% YPD	41aux	Ral437	2013-07-22	9	6	17	122	2x2	n
2013-07-31	5% YPD	JRY	Ral437	2013-07-22	26	16	48	122	2x2	y
2013-07-31	5% YPD	JRY	Ral437	2013-07-22	23	16	39	122	2x2	y
2013-07-31	5% YPD	JRY	Ral437	2013-07-22	4	7	11	122	Diamond	n/a
2013-07-31	5% YPD	JRY	Ral437	2013-07-22	31	24	55	122	Diamond	n/a
2013-07-31	5% YPD	41aux	Ral437	2013-07-22	17	14	31	122	Diamond	n/a
2013-07-31	5% YPD	41aux	Ral437	2013-07-22	13	12	25	122	Diamond	n/a
2013-07-18	5% YPD	BY4742 aux	Ral 437	2013-07-08	6	14	20	105	Diamond	N/A	T
2013-07-18	5% YPD	BY4742 aux	Ral 437	2013-07-08	16	15	31	105	Diamond	N/A	T
2013-07-18	5% YPD	JRY 6331	Ral 437	2013-07-08	10	9	19	105	Diamond	N/A	T
2013-07-18	5% YPD	JRY 6331	Ral 437	2013-07-08	15	20	35	105	Diamond	N/A	T
2013-07-18	5% YPD	BY4742 aux	Ral 437	2013-07-09	20	14	34	112	2x2	yes	T
2013-07-18	5% YPD	BY4742 aux	Ral 437	2013-07-09	6	6	12	112	2x2	yes	T
2013-07-18	5% YPD	JRY 6331	Ral 437	2013-07-09	25	10	35	112	2x2	no	T
2013-07-18	5% YPD	JRY 6331	Ral 437	2013-07-09	12	19	31	112	2x2	no	T
2013-07-18	5% YPD	BY4742 aux	Ral 437	2013-07-09	11	22	33	107	2x2	no	T
2013-07-18	5% YPD	BY4742 aux	Ral 437	2013-07-09	4	4	8	107	2x2	no	T
2013-07-18	5% YPD	JRY 6331	Ral 437	2013-07-09	21	13	34	107	2x2	yes	T
2013-07-18	5% YPD	JRY 6331	Ral 437	2013-07-09	16	16	32	107	2x2	yes	T
2013-09-27	5% YPD	BY4741 aux	Ral 437	2013-09-22	11	20	31	113	Diamond	N/A	K
2013-09-27	5% YPD	BY4741 aux	Ral 437	2013-09-22	19	25	44	113	Diamond	N/A	K
2013-09-27	5% YPD	BY4742 aux	Ral 437	2013-09-22	10	10	20	113	Diamond	N/A	K
2013-09-27	5% YPD	BY4742 aux	Ral 437	2013-09-22	4	14	18	113	Diamond	N/A	K
2013-07-25	5% YPD	BY4741 aux	Ral 324	2013-07-16	2	3	5	106	2x2	yes	T
2013-07-25	5% YPD	BY4741 aux	Ral 324	2013-07-16	46	38	84	106	2x2	yes	T
2013-07-25	5% YPD	BY4742 aux	Ral 324	2013-07-16	3	3	6	106	2x2	no	T
2013-07-25	5% YPD	BY4742 aux	Ral 324	2013-07-16	6	5	11	106	2x2	no	T

## Sheet: 41_v_Tet
Date Counted	Trial	Media	Yeast	Fly Line	1 day old date(of youngest)	# of flies	Female	Male	Total	Total Caught	Percentage Caught	Percetage Female	Percentage Male	Percentage Flies Trapped	Trap Orientation	Near Light
2013-10-31	1	5%Glu YPD	BY4741aux	Ral 437	2013-10-24	120	17	14	31	117	0.264957	0.548387	0.451613	0.975	1	BY4741aux
2013-10-31	1	5%Glu YPD	BY4741aux	Ral 437	2013-10-24	120	13	11	24	117	0.205128	0.541667	0.458333	0.975	1	BY4741aux
2013-10-31	1	5%Glu YPD	Tet18_B	Ral 437	2013-10-24	120	7	19	26	117	0.222222	0.269231	0.730769	0.975	1	BY4741aux
2013-10-31	1	5%Glu YPD	Tet18_B	Ral 437	2013-10-24	120	18	18	36	117	0.307692	0.5	0.5	0.975	1	BY4741aux
2013-10-31	2	5%Glu YPD	BY4741aux	Ral 437	2013-10-24	120	9	14	23	116	0.198276	0.391304	0.608696	0.966667	1	BY4741aux
2013-10-31	2	5%Glu YPD	BY4741aux	Ral 437	2013-10-24	120	11	20	31	116	0.267241	0.354839	0.645161	0.966667	1	BY4741aux
2013-10-31	2	5%Glu YPD	Tet18_C	Ral 437	2013-10-24	120	9	14	23	116	0.198276	0.391304	0.608696	0.966667	1	BY4741aux
2013-10-31	2	5%Glu YPD	Tet18_C	Ral 437	2013-10-24	120	18	19	37	116	0.318966	0.486486	0.513514	0.966667	1	BY4741aux
2013-10-31	3	5%Glu YPD	BY4741aux	Ral 437	2013-10-24	120	23	3	26	115	0.226087	0.884615	0.115385	0.958333	1	BY4741aux
2013-10-31	3	5%Glu YPD	BY4741aux	Ral 437	2013-10-24	120	17	13	30	115	0.26087	0.566667	0.433333	0.958333	1	BY4741aux
2013-10-31	3	5%Glu YPD	Tet18_A	Ral 437	2013-10-24	120	20	14	34	115	0.295652	0.588235	0.411765	0.958333	1	BY4741aux
2013-10-31	3	5%Glu YPD	Tet18_A	Ral 437	2013-10-24	120	14	11	25	115	0.217391	0.56	0.44	0.958333	1	BY4741aux
2013-10-31	4	5%Glu YPD	BY4741aux	Ral 437	2013-10-28	120	6	9	15	119	0.12605	0.4	0.6	0.991667	1	BY4741aux
2013-10-31	4	5%Glu YPD	BY4741aux	Ral 437	2013-10-28	120	21	11	32	119	0.268908	0.65625	0.34375	0.991667	1	BY4741aux
2013-10-31	4	5%Glu YPD	Tet18_D	Ral 437	2013-10-28	120	16	20	36	119	0.302521	0.444444	0.555556	0.991667	1	BY4741aux
2013-10-31	4	5%Glu YPD	Tet18_D	Ral 437	2013-10-28	120	19	17	36	119	0.302521	0.527778	0.472222	0.991667	1	BY4741aux
2013-11-07	1	5%Glu YPD	BY4741aux	Ral 437	2013-11-01	120	0	1	1	94	0.0106383	0	1	0.783333	1	Tet18_A
2013-11-07	1	5%Glu YPD	BY4741aux	Ral 437	2013-11-01	120	9	19	28	94	0.297872	0.321429	0.678571	0.783333	1	Tet18_A
2013-11-07	1	5%Glu YPD	Tet18_A	Ral 437	2013-11-01	120	21	4	25	94	0.265957	0.84	0.16	0.783333	1	Tet18_A
2013-11-07	1	5%Glu YPD	Tet18_A	Ral 437	2013-11-01	120	18	22	40	94	0.425532	0.45	0.55	0.783333	1	Tet18_A
2013-11-07	2	5%Glu YPD	BY4741aux	Ral 437	2013-11-01	120	0	0	0	114	0	#DIV/0!	#DIV/0!	0.95	1	Tet18_B
2013-11-07	2	5%Glu YPD	BY4741aux	Ral 437	2013-11-01	120	6	10	16	114	0.140351	0.375	0.625	0.95	1	Tet18_B
2013-11-07	2	5%Glu YPD	Tet18_B	Ral 437	2013-11-01	120	35	40	75	114	0.657895	0.466667	0.533333	0.95	1	Tet18_B
2013-11-07	2	5%Glu YPD	Tet18_B	Ral 437	2013-11-01	120	12	11	23	114	0.201754	0.521739	0.478261	0.95	1	Tet18_B
2013-11-08	1	5%Glu YPD	BY4741aux	Ral 437	2013-11-04	120	18	26	44	115	0.382609	0.409091	0.590909	0.958333	1	Tet18_C
2013-11-08	1	5%Glu YPD	BY4741aux	Ral 437	2013-11-04	120	7	6	13	115	0.113043	0.538462	0.461538	0.958333	1	Tet18_C
2013-11-08	1	5%Glu YPD	Tet18_C	Ral 437	2013-11-04	120	10	15	25	115	0.217391	0.4	0.6	0.958333	1	Tet18_C
2013-11-08	1	5%Glu YPD	Tet18_C	Ral 437	2013-11-04	120	13	20	33	115	0.286957	0.393939	0.606061	0.958333	1	Tet18_C
2013-11-08	2	5%Glu YPD	BY4741aux	Ral 437	2013-11-04	120	21	10	31	117	0.264957	0.677419	0.322581	0.975	1	Tet18_D
2013-11-08	2	5%Glu YPD	BY4741aux	Ral 437	2013-11-04	120	14	10	24	117	0.205128	0.583333	0.416667	0.975	1	Tet18_D
2013-11-08	2	5%Glu YPD	Tet18_D	Ral 437	2013-11-04	120	20	16	36	117	0.307692	0.555556	0.444444	0.975	1	Tet18_D
2013-11-08	2	5%Glu YPD	Tet18_D	Ral 437	2013-11-04	120	13	13	26	117	0.222222	0.5	0.5	0.975	1	Tet18_D
2013-11-14	1	5%Glu YPD	BY4741aux	Ral 437	2013-11-04	120	17	7	24	106	0.226415	0.708333	0.291667	0.883333	2	BY4741aux
2013-11-14	1	5%Glu YPD	BY4741aux	Ral 437	2013-11-04	120	15	15	30	106	0.283019	0.5	0.5	0.883333	2	BY4741aux
2013-11-14	1	5%Glu YPD	Tet18_D	Ral 437	2013-11-04	120	9	9	18	106	0.169811	0.5	0.5	0.883333	2	BY4741aux
2013-11-14	1	5%Glu YPD	Tet18_D	Ral 437	2013-11-04	120	18	16	34	106	0.320755	0.529412	0.470588	0.883333	2	BY4741aux
2013-11-14	2	5%Glu YPD	BY4741aux	Ral 437	2013-11-04	120	16	14	30	108	0.277778	0.533333	0.466667	0.9	2	BY4741aux
2013-11-14	2	5%Glu YPD	BY4741aux	Ral 437	2013-11-04	120	16	20	36	108	0.333333	0.444444	0.555556	0.9	2	BY4741aux
2013-11-14	2	5%Glu YPD	Tet18_B	Ral 437	2013-11-04	120	10	12	22	108	0.203704	0.454545	0.545455	0.9	2	BY4741aux
2013-11-14	2	5%Glu YPD	Tet18_B	Ral 437	2013-11-04	120	12	8	20	108	0.185185	0.6	0.4	0.9	2	BY4741aux
2013-11-14	3	5%Glu YPD	BY4741aux	Ral 437	2013-11-04	120	19	20	39	114	0.342105	0.487179	0.512821	0.95	2	BY4741aux
2013-11-14	3	5%Glu YPD	BY4741aux	Ral 437	2013-11-04	120	24	16	40	114	0.350877	0.6	0.4	0.95	2	BY4741aux
2013-11-14	3	5%Glu YPD	Tet18_C	Ral 437	2013-11-04	120	2	7	9	114	0.0789474	0.222222	0.777778	0.95	2	BY4741aux
2013-11-14	3	5%Glu YPD	Tet18_C	Ral 437	2013-11-04	120	16	10	26	114	0.22807	0.615385	0.384615	0.95	2	BY4741aux
2013-11-14	4	5%Glu YPD	BY4741aux	Ral 437	2013-11-04	120	0	6	6	106	0.0566038	0	1	0.883333	2	BY4741aux
2013-11-14	4	5%Glu YPD	BY4741aux	Ral 437	2013-11-04	120	3	8	11	106	0.103774	0.272727	0.727273	0.883333	2	BY4741aux
2013-11-14	4	5%Glu YPD	Tet18_A	Ral 437	2013-11-04	120	36	24	60	106	0.566038	0.6	0.4	0.883333	2	BY4741aux
2013-11-14	4	5%Glu YPD	Tet18_A	Ral 437	2013-11-04	120	22	7	29	106	0.273585	0.758621	0.241379	0.883333	2	BY4741aux
2013-11-15	1	5%Glu YPD	BY4741aux	Ral 437	2013-11-05	120	6	11	17	113	0.150442	0.352941	0.647059	0.941667	2	Tet18_D
2013-11-15	1	5%Glu YPD	BY4741aux	Ral 437	2013-11-05	120	11	3	14	113	0.123894	0.785714	0.214286	0.941667	2	Tet18_D
2013-11-15	1	5%Glu YPD	Tet18_D	Ral 437	2013-11-05	120	22	24	46	113	0.40708	0.478261	0.521739	0.941667	2	Tet18_D
2013-11-15	1	5%Glu YPD	Tet18_D	Ral 437	2013-11-05	120	19	17	36	113	0.318584	0.527778	0.472222	0.941667	2	Tet18_D
2013-11-15	2	5%Glu YPD	BY4741aux	Ral 437	2013-11-04	120	11	11	22	115	0.191304	0.5	0.5	0.958333	2	Tet18_B
2013-11-15	2	5%Glu YPD	BY4741aux	Ral 437	2013-11-04	120	12	11	23	115	0.2	0.521739	0.478261	0.958333	2	Tet18_B
2013-11-15	2	5%Glu YPD	Tet18_B	Ral 437	2013-11-04	120	18	16	34	115	0.295652	0.529412	0.470588	0.958333	2	Tet18_B
2013-11-15	2	5%Glu YPD	Tet18_B	Ral 437	2013-11-04	120	17	19	36	115	0.313043	0.472222	0.527778	0.958333	2	Tet18_B
2013-11-15	3	5%Glu YPD	BY4741aux	Ral 437	2013-11-05	120	5	3	8	115	0.0695652	0.625	0.375	0.958333	2	Tet18_C
2013-11-15	3	5%Glu YPD	BY4741aux	Ral 437	2013-11-05	120	12	7	19	115	0.165217	0.631579	0.368421	0.958333	2	Tet18_C
2013-11-15	3	5%Glu YPD	Tet18_C	Ral 437	2013-11-05	120	32	22	54	115	0.469565	0.592593	0.407407	0.958333	2	Tet18_C
2013-11-15	3	5%Glu YPD	Tet18_C	Ral 437	2013-11-05	120	20	14	34	115	0.295652	0.588235	0.411765	0.958333	2	Tet18_C
2013-11-15	4	5%Glu YPD	BY4741aux	Ral 437	2013-11-05	120	8	10	18	116	0.155172	0.444444	0.555556	0.966667	2	Tet18_A
2013-11-15	4	5%Glu YPD	BY4741aux	Ral 437	2013-11-05	120	12	13	25	116	0.215517	0.48	0.52	0.966667	2	Tet18_A
2013-11-15	4	5%Glu YPD	Tet18_A	Ral 437	2013-11-05	120	21	14	35	116	0.301724	0.6	0.4	0.966667	2	Tet18_A
2013-11-15	4	5%Glu YPD	Tet18_A	Ral 437	2013-11-05	120	23	16	39	116	0.336207	0.589744	0.410256	0.966667	2	Tet18_A
2013-10-30	1	5%Glu YPD	BY4741aux	Ral 437	2013-10-28	120	10	7	17	114	0.149123	0.588235	0.411765	0.95	1	BY4741aux
2013-10-30	1	5%Glu YPD	BY4741aux	Ral 437	2013-10-28	120	23	36	59	114	0.517544	0.389831	0.610169	0.95	1	BY4741aux
2013-10-30	1	5%Glu YPD	Tet18_A	Ral 437	2013-10-28	120	20	17	37	114	0.324561	0.540541	0.459459	0.95	1	BY4741aux
2013-10-30	1	5%Glu YPD	Tet18_A	Ral 437	2013-10-28	120	0	1	1	114	0.00877193	0	1	0.95	1	BY4741aux
2013-10-30	2	5%Glu YPD	BY4741aux	Ral 437	2013-10-28	120	1	8	9	120	0.075	0.111111	0.888889	1	1	BY4741aux
2013-10-30	2	5%Glu YPD	BY4741aux	Ral 437	2013-10-28	120	8	44	52	120	0.433333	0.153846	0.846154	1	1	BY4741aux
2013-10-30	2	5%Glu YPD	Tet18_B	Ral 437	2013-10-28	120	6	7	13	120	0.108333	0.461538	0.538462	1	1	BY4741aux
2013-10-30	2	5%Glu YPD	Tet18_B	Ral 437	2013-10-28	120	14	32	46	120	0.383333	0.304348	0.695652	1	1	BY4741aux
2013-10-30	3	5%Glu YPD	BY4741aux	Ral 437	2013-10-28	120	0	3	3	115	0.026087	0	1	0.958333	1	BY4741aux
2013-10-30	3	5%Glu YPD	BY4741aux	Ral 437	2013-10-28	120	17	61	78	115	0.678261	0.217949	0.782051	0.958333	1	BY4741aux
2013-10-30	3	5%Glu YPD	Tet18_C	Ral 437	2013-10-28	120	9	20	29	115	0.252174	0.310345	0.689655	0.958333	1	BY4741aux
2013-10-30	3	5%Glu YPD	Tet18_C	Ral 437	2013-10-28	120	4	1	5	115	0.0434783	0.8	0.2	0.958333	1	BY4741aux
2013-10-30	4	5%Glu YPD	BY4741aux	Ral 437	2013-10-28	120	3	11	14	114	0.122807	0.214286	0.785714	0.95	1	BY4741aux
2013-10-30	4	5%Glu YPD	BY4741aux	Ral 437	2013-10-28	120	23	32	55	114	0.482456	0.418182	0.581818	0.95	1	BY4741aux
2013-10-30	4	5%Glu YPD	Tet18_D	Ral 437	2013-10-28	120	15	10	25	114	0.219298	0.6	0.4	0.95	1	BY4741aux
2013-10-30	4	5%Glu YPD	Tet18_D	Ral 437	2013-10-28	120	9	11	20	114	0.175439	0.45	0.55	0.95	1	BY4741aux
2014-02-20	1	5%Glu YPD	BY4741aux	Ral 437	2014-02-10	120	13	4	17	119	0.142857	0.764706	0.235294	0.991667	1	BY4741aux
2014-02-20	1	5%Glu YPD	BY4741aux	Ral 437	2014-02-10	120	16	18	34	119	0.285714	0.470588	0.529412	0.991667	1	BY4741aux
2014-02-20	1	5%Glu YPD	Tet1_A	Ral 437	2014-02-10	120	28	16	44	119	0.369748	0.636364	0.363636	0.991667	1	BY4741aux
2014-02-20	1	5%Glu YPD	Tet1_A	Ral 437	2014-02-10	120	10	14	24	119	0.201681	0.416667	0.583333	0.991667	1	BY4741aux
2014-02-20	2	5%Glu YPD	BY4741aux	Ral 437	2014-02-10	120	6	8	14	115	0.121739	0.428571	0.571429	0.958333	1	BY4741aux
2014-02-20	2	5%Glu YPD	BY4741aux	Ral 437	2014-02-10	120	9	12	21	115	0.182609	0.428571	0.571429	0.958333	1	BY4741aux
2014-02-20	2	5%Glu YPD	Tet1_C	Ral 437	2014-02-10	120	20	33	53	115	0.46087	0.377358	0.622642	0.958333	1	BY4741aux
2014-02-20	2	5%Glu YPD	Tet1_C	Ral 437	2014-02-10	120	9	18	27	115	0.234783	0.333333	0.666667	0.958333	1	BY4741aux
2014-02-20	3	5%Glu YPD	BY4741aux	Ral 437	2014-02-10	120	23	2	25	121	0.206612	0.92	0.08	1.00833	1	BY4741aux
2014-02-20	3	5%Glu YPD	BY4741aux	Ral 437	2014-02-10	120	8	9	17	121	0.140496	0.470588	0.529412	1.00833	1	BY4741aux
2014-02-20	3	5%Glu YPD	Tet1_B	Ral 437	2014-02-10	120	15	12	27	121	0.22314	0.555556	0.444444	1.00833	1	BY4741aux
2014-02-20	3	5%Glu YPD	Tet1_B	Ral 437	2014-02-10	120	38	10	48	121	0.396694	0.791667	0.208333	1.00833	1	BY4741aux
2014-02-20	4	5%Glu YPD	BY4741aux	Ral 437	2014-02-10	120	9	20	29	117	0.247863	0.310345	0.689655	0.975	1	BY4741aux
2014-02-20	4	5%Glu YPD	BY4741aux	Ral 437	2014-02-10	120	17	16	33	117	0.282051	0.515152	0.484848	0.975	1	BY4741aux
2014-02-20	4	5%Glu YPD	Tet1_D	Ral 437	2014-02-10	120	14	13	27	117	0.230769	0.518519	0.481481	0.975	1	BY4741aux
2014-02-20	4	5%Glu YPD	Tet1_D	Ral 437	2014-02-10	120	21	8	29	117	0.247863	0.724138	0.275862	0.975	1	BY4741aux
2014-02-20	5	5%Glu YPD	Tet1_A	Ral 437	2014-02-10	120	16	18	34	118	0.288136	0.470588	0.529412	0.983333	1	Tet1_A
2014-02-20	5	5%Glu YPD	Tet1_A	Ral 437	2014-02-10	120	15	15	30	118	0.254237	0.5	0.5	0.983333	1	Tet1_A
2014-02-20	5	5%Glu YPD	BY4741aux	Ral 437	2014-02-10	120	17	11	28	118	0.237288	0.607143	0.392857	0.983333	1	Tet1_A
2014-02-20	5	5%Glu YPD	BY4741aux	Ral 437	2014-02-10	120	11	15	26	118	0.220339	0.423077	0.576923	0.983333	1	Tet1_A
2014-02-26	1	5%Glu YPD	Tet1_A	Ral 437	2014-02-17	120	12	12	24	112	0.214286	0.5	0.5	0.933333	2	BY4741aux
2014-02-26	1	5%Glu YPD	Tet1_A	Ral 437	2014-02-17	120	16	16	32	112	0.285714	0.5	0.5	0.933333	2	BY4741aux
2014-02-26	1	5%Glu YPD	BY4741aux	Ral 437	2014-02-17	120	9	8	17	112	0.151786	0.529412	0.470588	0.933333	2	BY4741aux
2014-02-26	1	5%Glu YPD	BY4741aux	Ral 437	2014-02-17	120	22	17	39	112	0.348214	0.564103	0.435897	0.933333	2	BY4741aux
2014-02-26	2	5%Glu YPD	Tet1_B	Ral 437	2014-02-17	120	7	3	10	105	0.0952381	0.7	0.3	0.875	2	BY4741aux
2014-02-26	2	5%Glu YPD	Tet1_B	Ral 437	2014-02-17	120	20	18	38	105	0.361905	0.526316	0.473684	0.875	2	BY4741aux
2014-02-26	2	5%Glu YPD	BY4741aux	Ral 437	2014-02-17	120	20	12	32	105	0.304762	0.625	0.375	0.875	2	BY4741aux
2014-02-26	2	5%Glu YPD	BY4741aux	Ral 437	2014-02-17	120	13	12	25	105	0.238095	0.52	0.48	0.875	2	BY4741aux
2014-02-26	3	5%Glu YPD	Tet1_B	Ral 437	2014-02-17	120	9	14	23	109	0.211009	0.391304	0.608696	0.908333	1	Tet1_B
2014-02-26	3	5%Glu YPD	Tet1_B	Ral 437	2014-02-17	120	20	7	27	109	0.247706	0.740741	0.259259	0.908333	1	Tet1_B
2014-02-26	3	5%Glu YPD	BY4741aux	Ral 437	2014-02-17	120	8	6	14	109	0.12844	0.571429	0.428571	0.908333	1	Tet1_B
2014-02-26	3	5%Glu YPD	BY4741aux	Ral 437	2014-02-17	120	19	26	45	109	0.412844	0.422222	0.577778	0.908333	1	Tet1_B
2014-02-26	4	5%Glu YPD	Tet1_C	Ral 437	2014-02-17	120	14	16	30	113	0.265487	0.466667	0.533333	0.941667	1	Tet1_C
2014-02-26	4	5%Glu YPD	Tet1_C	Ral 437	2014-02-17	120	16	10	26	113	0.230088	0.615385	0.384615	0.941667	1	Tet1_C
2014-02-26	4	5%Glu YPD	BY4741aux	Ral 437	2014-02-17	120	16	17	33	113	0.292035	0.484848	0.515152	0.941667	1	Tet1_C
2014-02-26	4	5%Glu YPD	BY4741aux	Ral 437	2014-02-17	120	17	7	24	113	0.212389	0.708333	0.291667	0.941667	1	Tet1_C
2014-02-26	5	5%Glu YPD	Tet1_D	Ral 437	2014-02-17	120	10	8	18	110	0.163636	0.555556	0.444444	0.916667	1	Tet1_D
2014-02-26	5	5%Glu YPD	Tet1_D	Ral 437	2014-02-17	120	23	19	42	110	0.381818	0.547619	0.452381	0.916667	1	Tet1_D
2014-02-26	5	5%Glu YPD	BY4741aux	Ral 437	2014-02-17	120	10	6	16	110	0.145455	0.625	0.375	0.916667	1	Tet1_D
2014-02-26	5	5%Glu YPD	BY4741aux	Ral 437	2014-02-17	120	20	14	34	110	0.309091	0.588235	0.411765	0.916667	1	Tet1_D
2014-02-27	1	5%Glu YPD	BY4741aux	Ral 437	2014-02-17	120	16	18	34	117	0.290598	0.470588	0.529412	0.975	2	Tet1_A
2014-02-27	1	5%Glu YPD	BY4741aux	Ral 437	2014-02-17	120	19	12	31	117	0.264957	0.612903	0.387097	0.975	2	Tet1_A
2014-02-27	1	5%Glu YPD	Tet1_A	Ral 437	2014-02-17	120	16	17	33	117	0.282051	0.484848	0.515152	0.975	2	Tet1_A
2014-02-27	1	5%Glu YPD	Tet1_A	Ral 437	2014-02-17	120	14	5	19	117	0.162393	0.736842	0.263158	0.975	2	Tet1_A
2014-02-27	2	5%Glu YPD	Tet1_C	Ral 437	2014-02-17	120	19	12	31	118	0.262712	0.612903	0.387097	0.983333	2	BY4741aux
2014-02-27	2	5%Glu YPD	Tet1_C	Ral 437	2014-02-17	120	11	12	23	118	0.194915	0.478261	0.521739	0.983333	2	BY4741aux
2014-02-27	2	5%Glu YPD	BY4741aux	Ral 437	2014-02-17	120	19	14	33	118	0.279661	0.575758	0.424242	0.983333	2	BY4741aux
2014-02-27	2	5%Glu YPD	BY4741aux	Ral 437	2014-02-17	120	16	13	29	118	0.245763	0.551724	0.448276	0.983333	2	BY4741aux
2014-02-27	3	5%Glu YPD	BY4741aux	Ral 437	2014-02-18	120	10	14	24	110	0.218182	0.416667	0.583333	0.916667	2	Tet1_C
2014-02-27	3	5%Glu YPD	BY4741aux	Ral 437	2014-02-18	120	17	13	30	110	0.272727	0.566667	0.433333	0.916667	2	Tet1_C
2014-02-27	3	5%Glu YPD	Tet1_C	Ral 437	2014-02-18	120	18	8	26	110	0.236364	0.692308	0.307692	0.916667	2	Tet1_C
2014-02-27	3	5%Glu YPD	Tet1_C	Ral 437	2014-02-18	120	18	12	30	110	0.272727	0.6	0.4	0.916667	2	Tet1_C
2014-02-27	4	5%Glu YPD	BY4741aux	Ral 437	2014-02-19	120	7	13	20	116	0.172414	0.35	0.65	0.966667	2	Tet1_B
2014-02-27	4	5%Glu YPD	BY4741aux	Ral 437	2014-02-19	120	18	16	34	116	0.293103	0.529412	0.470588	0.966667	2	Tet1_B
2014-02-27	4	5%Glu YPD	Tet1_B	Ral 437	2014-02-19	120	11	11	22	116	0.189655	0.5	0.5	0.966667	2	Tet1_B
2014-02-27	4	5%Glu YPD	Tet1_B	Ral 437	2014-02-19	120	19	20	39	116	0.336207	0.487179	0.512821	0.966667	2	Tet1_B
2014-02-27	5	5%Glu YPD	Tet1_D	Ral 437	2014-02-19	120	13	11	24	106	0.226415	0.541667	0.458333	0.883333	2	BY4741aux
2014-02-27	5	5%Glu YPD	Tet1_D	Ral 437	2014-02-19	120	14	11	25	106	0.235849	0.56	0.44	0.883333	2	BY4741aux
2014-02-27	5	5%Glu YPD	BY4741aux	Ral 437	2014-02-19	120	12	7	19	106	0.179245	0.631579	0.368421	0.883333	2	BY4741aux
2014-02-27	5	5%Glu YPD	BY4741aux	Ral 437	2014-02-19	120	14	24	38	106	0.358491	0.368421	0.631579	0.883333	2	BY4741aux
2014-02-28	1	5%Glu YPD	BY4741aux	Ral 437	2014-02-20	120	4	12	16	108	0.148148	0.25	0.75	0.9	2	Tet1_D
2014-02-28	1	5%Glu YPD	BY4741aux	Ral 437	2014-02-20	120	9	10	19	108	0.175926	0.473684	0.526316	0.9	2	Tet1_D
2014-02-28	1	5%Glu YPD	Tet1_D	Ral 437	2014-02-20	120	21	29	50	108	0.462963	0.42	0.58	0.9	2	Tet1_D
2014-02-28	1	5%Glu YPD	Tet1_D	Ral 437	2014-02-20	120	10	13	23	108	0.212963	0.434783	0.565217	0.9	2	Tet1_D

## Sheet: 41_v_Tet_mat
Strain	FlyLine	Count	Total	Attractiveness	Percentage Caught	Met15	Lys2	Mating Type	Tetrad	Segregant	Trap Type	4241ornot
BY4741aux_18_B	Ral 437	55	117	0.470085	0.98	-	+	a	18	B	41	41
Tetrad18_B	Rel 437	62	117	0.529915	0.98	-	-	alpha	18	B	41T	1
BY4741aux_18_C	Ral 437	60	116	0.517241	0.97	-	+	a	18	C	41	41
Tetrad18_C	Rel 437	56	116	0.482759	0.97	+	+	a	18	C	41T	1
BY4741aux_18_A	Ral 437	56	115	0.486957	0.96	-	+	a	18	A	41	41
Tetrad18_A	Rel 437	59	115	0.513043	0.96	-	-	a	18	A	41T	1
BY4741aux_18_D	Ral 437	47	119	0.394958	0.99	-	+	a	18	D	41	41
Tetrad18_D	Rel 437	72	119	0.605042	0.99	+	+	alpha	18	D	41T	1
BY4741aux_18_A	Ral 437	29	94	0.308511	0.78	-	+	a	18	A	41	41
Tetrad18_A	Rel 437	65	94	0.691489	0.78	-	-	a	18	A	41T	1
BY4741aux_18_B	Ral 437	16	114	0.140351	0.95	-	+	a	18	B	41	41
Tetrad18_B	Rel 437	98	114	0.859649	0.95	-	-	alpha	18	B	41T	1
BY4741aux_18_C	Ral 437	57	115	0.495652	0.96	-	+	a	18	C	41	41
Tetrad18_C	Rel 437	58	115	0.504348	0.96	+	+	a	18	C	41T	1
BY4741aux_18_D	Ral 437	55	117	0.470085	0.97	-	+	a	18	D	41	41
Tetrad18_D	Rel 437	62	117	0.529915	0.97	+	+	alpha	18	D	41T	1
BY4741aux_18_D	Ral 437	54	106	0.509434	0.88	-	+	a	18	D	41	41
Tetrad18_D	Rel 437	52	106	0.490566	0.88	+	+	alpha	18	D	41T	1
BY4741aux_18_B	Ral 437	66	108	0.611111	0.9	-	+	a	18	B	41	41
Tetrad18_B	Rel 437	42	108	0.388889	0.9	-	-	alpha	18	B	41T	1
BY4741aux_18_C	Ral 437	79	114	0.692982	0.95	-	+	a	18	C	41	41
Tetrad18_C	Rel 437	35	114	0.307018	0.95	+	+	a	18	C	41T	1
BY4741aux_18_A	Ral 437	17	106	0.160377	0.88	-	+	a	18	A	41	41
Tetrad18_A	Rel 437	89	106	0.839623	0.88	-	-	a	18	A	41T	1
BY4741aux_18_D	Ral 437	31	113	0.274336	0.94	-	+	a	18	D	41	41
Tetrad18_D	Rel 437	82	113	0.725664	0.94	+	+	alpha	18	D	41T	1
BY4741aux_18_B	Ral 437	45	115	0.391304	0.96	-	+	a	18	B	41	41
Tetrad18_B	Rel 437	70	115	0.608696	0.96	-	-	alpha	18	B	41T	1
BY4741aux_18_C	Ral 437	27	115	0.234783	0.96	-	+	a	18	C	41	41
Tetrad18_C	Rel 437	88	115	0.765217	0.96	+	+	a	18	C	41T	1
BY4741aux_18_A	Ral 437	42	116	0.362069	0.97	-	+	a	18	A	41	41
Tetrad18_A	Rel 437	74	116	0.637931	0.97	-	-	a	18	A	41T	1
BY4741aux_18_A	Ral 437	76	114	0.666667	0.95	-	+	a	18	A	41	41
Tetrad18_A	Rel 437	38	114	0.333333	0.95	-	-	a	18	A	41T	1
BY4741aux_18_B	Ral 437	61	120	0.508333	1	-	+	a	18	B	41	41
Tetrad18_B	Rel 437	59	120	0.491667	1	-	-	alpha	18	B	41T	1
BY4741aux_18_C	Ral 437	81	115	0.704348	0.96	-	+	a	18	C	41	41
Tetrad18_C	Rel 437	34	115	0.295652	0.96	+	+	a	18	C	41T	1
BY4741aux_18_D	Ral 437	69	114	0.605263	0.95	-	+	a	18	D	41	41
Tetrad18_D	Rel 437	45	114	0.394737	0.95	+	+	alpha	18	D	41T	1
BY4741aux_1_A	Ral 437	51	119	0.428571	0.99	-	+	a		A	41	41
Tetrad1_A	Rel 437	68	119	0.571429	0.99	-	-	alpha	1	A	41T	1
BY4741aux_1_C	Ral 437	35	115	0.304348	0.96	-	+	a		C	41	41
Tetrad1_C	Rel 437	80	115	0.695652	0.96	+	+	a	1	C	41T	1
BY4741aux_1_B	Ral 437	42	121	0.347107	1	-	+	a		B	41	41
Tetrad1_B	Rel 437	75	121	0.619835	1	-	+	alpha	1	B	41T	1
BY4741aux_1_D	Ral 437	62	117	0.529915	0.98	-	+	a		C	41	41
Tetrad1_D	Rel 437	56	117	0.478632	0.98	+	-	a	1	D	41T	1
Tetrad1_A	Ral 437	64	118	0.542373	0.98	-	-	alpha	1	A	41T	1
BY4741aux_1_A	Rel 437	54	118	0.457627	0.98	-	+	a		A	41	41
Tetrad1_A	Ral 437	56	112	0.5	0.93	-	-	alpha	1	A	41T	1
BY4741aux_1_A	Rel 437	56	112	0.5	0.93	-	+	a		A	41	41
Tetrad1_B	Ral 437	48	105	0.457143	0.88	-	+	alpha	1	B	41T	1
BY4741aux_1_B	Rel 437	57	105	0.542857	0.88	-	+	a		B	41	41
Tetrad1_B	Ral 437	50	109	0.458716	0.9	-	+	alpha	1	B	41T	1
BY4741aux_1_B	Rel 437	59	109	0.541284	0.9	-	+	a		B	41	41
Tetrad1_C	Ral 437	56	113	0.495575	0.94	+	+	a	1	C	41T	1
BY4741aux_1_C	Rel 437	57	113	0.504425	0.94	-	+	a		C	41	41
Tetrad1_D	Ral 437	60	110	0.545455	0.92	+	-	a	1	D	41T	1
BY4741aux_1_D	Rel 437	50	110	0.454545	0.92	-	+	a		D	41	41
BY4741aux_1_A	Ral 437	65	117	0.555556	0.98	-	+	a		A	41	41
Tetrad1_A	Rel 437	52	117	0.444444	0.98	-	-	alpha	1	A	41T	1
Tetrad1_C	Ral 437	54	116	0.465517	0.98	+	+	a	1	C	41T	1
BY4741aux_1_C	Rel 437	62	116	0.534483	0.98	-	+	a		C	41	41
BY4741aux_1_C	Ral 437	54	110	0.490909	0.92	-	+	a		C	41	41
Tetrad1_C	Rel 437	56	110	0.509091	0.92	+	+	a	1	C	41T	1
BY4741aux_1_B	Ral 437	54	116	0.465517	0.97	-	+	a		B	41	41
Tetrad1_B	Rel 437	61	116	0.525862	0.97	-	+	alpha	1	B	41T	1
Tetrad1_D	Ral 437	49	106	0.462264	0.88	+	-	a	1	D	41T	1
BY4741aux_1_D	Rel 437	47	106	0.443396	0.88	-	+	a		D	41	41
BY4741aux_1_D	Ral 437	35	108	0.324074	0.9	-	+	a		D	41	14
Tetrad1_D	Rel 437	73	108	0.675926	0.9	+	-	a	1	D	41T	1

## Sheet: 41_42_v_Tet_mat.csv
Strain	FlyLine	Count	Total	Attractiveness	Percentage Caught	Met15	Lys2	Mating Type	Tetrad	Segregant	Trap Type	4241ornot
BY4742aux_18_A	Ral 437	26	81	0.32	0.68	+	-	alpha	18	A	42	42
BY4742aux_18_A	Ral 437	42	113	0.37	0.91	+	-	alpha	18	A	42	42
BY4742aux_18_A	Ral 437	32	115	0.28	0.98	+	-	alpha	18	A	42	42
BY4742aux_18_B	Ral 437	23	56	0.41	0.51	+	-	alpha	18	B	42	42
BY4742aux_18_B	Ral 437	52	111	0.47	0.9	+	-	alpha	18	B	42	42
BY4742aux_18_B	Ral 437	25	119	0.21	0.98	+	-	alpha	18	B	42	42
BY4742aux_18_C	Ral 437	22	99	0.22	0.79	+	-	alpha	18	C	42	42
BY4742aux_18_C	Ral 437	69	103	0.67	0.86	+	-	alpha	18	C	42	42
BY4742aux_18_C	Ral 437	11	119	0.09	0.94	+	-	alpha	18	C	42	42
BY4742aux_18_D	Ral 437	37	98	0.38	0.78	+	-	alpha	18	D	42	42
BY4742aux_18_D	Ral 437	71	103	0.69	0.86	+	-	alpha	18	D	42	42
BY4742aux_18_D	Ral 437	42	108	0.39	0.86	+	-	alpha	18	D	42	42
Tetrad18_A	Ral 437	55	81	0.68	0.68	-	-	a	18	A	42T	1
Tetrad18_A	Ral 437	71	113	0.63	0.91	-	-	a	18	A	42T	1
Tetrad18_A	Ral 437	83	115	0.72	0.98	-	-	a	18	A	42T	1
Tetrad18_B	Ral 437	33	56	0.59	0.51	-	-	alpha	18	B	42T	1
Tetrad18_B	Ral 437	59	111	0.53	0.9	-	-	alpha	18	B	42T	1
Tetrad18_B	Ral 437	94	119	0.79	0.98	-	-	alpha	18	B	42T	1
Tetrad18_C	Ral 437	77	99	0.78	0.79	+	+	a	18	C	42T	1
Tetrad18_C	Ral 437	34	103	0.33	0.86	+	+	a	18	C	42T	1
Tetrad18_C	Ral 437	108	119	0.91	0.94	+	+	a	18	C	42T	1
Tetrad18_D	Ral 437	61	98	0.62	0.78	+	+	alpha	18	D	42T	1
Tetrad18_D	Ral 437	32	103	0.31	0.86	+	+	alpha	18	D	42T	1
Tetrad18_D	Ral 437	66	108	0.61	0.86	+	+	alpha	18	D	42T	1
BY4741aux_18_B	Ral 437	55	117	0.470085	0.98	-	+	a	18	B	41	41
Tetrad18_B	Ral 437	62	117	0.529915	0.98	-	-	alpha	18	B	41T	1
BY4741aux_18_C	Ral 437	60	116	0.517241	0.97	-	+	a	18	C	41	41
Tetrad18_C	Ral 437	56	116	0.482759	0.97	+	+	a	18	C	41T	1
BY4741aux_18_A	Ral 437	56	115	0.486957	0.96	-	+	a	18	A	41	41
Tetrad18_A	Ral 437	59	115	0.513043	0.96	-	-	a	18	A	41T	1
BY4741aux_18_D	Ral 437	47	119	0.394958	0.99	-	+	a	18	D	41	41
Tetrad18_D	Ral 437	72	119	0.605042	0.99	+	+	alpha	18	D	41T	1
BY4741aux_18_A	Ral 437	29	94	0.308511	0.78	-	+	a	18	A	41	41
Tetrad18_A	Ral 437	65	94	0.691489	0.78	-	-	a	18	A	41T	1
BY4741aux_18_B	Ral 437	16	114	0.140351	0.95	-	+	a	18	B	41	41
Tetrad18_B	Ral 437	98	114	0.859649	0.95	-	-	alpha	18	B	41T	1
BY4741aux_18_C	Ral 437	57	115	0.495652	0.96	-	+	a	18	C	41	41
Tetrad18_C	Ral 437	58	115	0.504348	0.96	+	+	a	18	C	41T	1
BY4741aux_18_D	Ral 437	55	117	0.470085	0.97	-	+	a	18	D	41	41
Tetrad18_D	Ral 437	62	117	0.529915	0.97	+	+	alpha	18	D	41T	1
BY4741aux_18_D	Ral 437	54	106	0.509434	0.88	-	+	a	18	D	41	41
Tetrad18_D	Ral 437	52	106	0.490566	0.88	+	+	alpha	18	D	41T	1
BY4741aux_18_B	Ral 437	66	108	0.611111	0.9	-	+	a	18	B	41	41
Tetrad18_B	Ral 437	42	108	0.388889	0.9	-	-	alpha	18	B	41T	1
BY4741aux_18_C	Ral 437	79	114	0.692982	0.95	-	+	a	18	C	41	41
Tetrad18_C	Ral 437	35	114	0.307018	0.95	+	+	a	18	C	41T	1
BY4741aux_18_A	Ral 437	17	106	0.160377	0.88	-	+	a	18	A	41	41
Tetrad18_A	Ral 437	89	106	0.839623	0.88	-	-	a	18	A	41T	1
BY4741aux_18_D	Ral 437	31	113	0.274336	0.94	-	+	a	18	D	41	41
Tetrad18_D	Ral 437	82	113	0.725664	0.94	+	+	alpha	18	D	41T	1
BY4741aux_18_B	Ral 437	45	115	0.391304	0.96	-	+	a	18	B	41	41
Tetrad18_B	Ral 437	70	115	0.608696	0.96	-	-	alpha	18	B	41T	1
BY4741aux_18_C	Ral 437	27	115	0.234783	0.96	-	+	a	18	C	41	41
Tetrad18_C	Ral 437	88	115	0.765217	0.96	+	+	a	18	C	41T	1
BY4741aux_18_A	Ral 437	42	116	0.362069	0.97	-	+	a	18	A	41	41
Tetrad18_A	Ral 437	74	116	0.637931	0.97	-	-	a	18	A	41T	1
BY4741aux_18_A	Ral 437	76	114	0.666667	0.95	-	+	a	18	A	41	41
Tetrad18_A	Ral 437	38	114	0.333333	0.95	-	-	a	18	A	41T	1
BY4741aux_18_B	Ral 437	61	120	0.508333	1	-	+	a	18	B	41	41
Tetrad18_B	Ral 437	59	120	0.491667	1	-	-	alpha	18	B	41T	1
BY4741aux_18_C	Ral 437	81	115	0.704348	0.96	-	+	a	18	C	41	41
Tetrad18_C	Ral 437	34	115	0.295652	0.96	+	+	a	18	C	41T	1
BY4741aux_18_D	Ral 437	69	114	0.605263	0.95	-	+	a	18	D	41	41
Tetrad18_D	Ral 437	45	114	0.394737	0.95	+	+	alpha	18	D	41T	1
BY4742aux_18_C	Ral 437	51	118	0.432203	0.98	+	-	alpha	18	C	42	42
Tetrad18_C	Ral 437	67	118	0.567797	0.98	+	+	a	18	C	42T	1
BY4742aux_18_D	Ral 437	36	118	0.305085	0.98	+	-	alpha	18	D	42	42
Tetrad18_D	Ral 437	82	118	0.694915	0.98	+	+	alpha	18	D	42T	1
Tetrad18_B	Ral 437	81	118	0.686441	0.98	-	-	alpha	18	B	42T	1
BY4742aux_18_B	Ral 437	37	118	0.313559	0.98	+	-	alpha	18	B	42	42
Tetrad18_C	Ral 437	76	114	0.666667	0.95	+	+	a	18	C	42T	1
BY4742aux_18_C	Ral 437	38	114	0.333333	0.95	+	-	alpha	18	C	42	42
Tetrad18_D	Ral 437	86	117	0.735043	0.97	+	+	alpha	18	D	42T	1
BY4742aux_18_D	Ral 437	31	117	0.264957	0.97	+	-	alpha	18	D	42	42
Tetrad18_A	Ral 437	68	114	0.596491	0.95	-	-	a	18	A	42T	1
BY4742aux_18_D	Ral 437	36	114	0.315789	0.95	+	-	alpha	18	A	42	42
BY4742aux_18_D	Ral 437	37	115	0.321739	0.96	+	-	alpha	18	A	42	42
Tetrad18_A	Ral 437	78	115	0.678261	0.96	-	-	a	18	A	42T	1
BY4741aux_1_A	Ral 437	51	119	0.428571	0.99	-	+	a	1	A	41	41
Tetrad1_A	Ral 437	68	119	0.571429	0.99	-	-	alpha	1	A	41T	1
BY4741aux_1_C	Ral 437	35	115	0.304348	0.96	-	+	a	1	C	41	41
Tetrad1_C	Ral 437	80	115	0.695652	0.96	+	+	a	1	C	41T	1
BY4741aux_1_B	Ral 437	42	121	0.347107	1	-	+	a	1	B	41	41
Tetrad1_B	Ral 437	75	121	0.619835	1	-	+	alpha	1	B	41T	1
BY4741aux_1_D	Ral 437	62	117	0.529915	0.98	-	+	a	1	C	41	41
Tetrad1_D	Ral 437	56	117	0.478632	0.98	+	-	a	1	D	41T	1
Tetrad1_A	Ral 437	64	118	0.542373	0.98	-	-	alpha	1	A	41T	1
BY4741aux_1_A	Ral 437	54	118	0.457627	0.98	-	+	a	1	A	41	41
Tetrad1_A	Ral 437	56	112	0.5	0.93	-	-	alpha	1	A	41T	1
BY4741aux_1_A	Ral 437	56	112	0.5	0.93	-	+	a	1	A	41	41
Tetrad1_B	Ral 437	48	105	0.457143	0.88	-	+	alpha	1	B	41T	1
BY4741aux_1_B	Ral 437	57	105	0.542857	0.88	-	+	a	1	B	41	41
Tetrad1_B	Ral 437	50	109	0.458716	0.9	-	+	alpha	1	B	41T	1
BY4741aux_1_B	Ral 437	59	109	0.541284	0.9	-	+	a	1	B	41	41
Tetrad1_C	Ral 437	56	113	0.495575	0.94	+	+	a	1	C	41T	1
BY4741aux_1_C	Ral 437	57	113	0.504425	0.94	-	+	a	1	C	41	41
Tetrad1_D	Ral 437	60	110	0.545455	0.92	+	-	a	1	D	41T	1
BY4741aux_1_D	Ral 437	50	110	0.454545	0.92	-	+	a	1	D	41	41
BY4741aux_1_A	Ral 437	65	117	0.555556	0.98	-	+	a	1	A	41	41
Tetrad1_A	Ral 437	52	117	0.444444	0.98	-	-	alpha	1	A	41T	1
Tetrad1_C	Ral 437	54	118	0.457627	0.98	+	+	a	1	C	41T	1
BY4741aux_1_D	Ral 437	62	118	0.525424	0.98	-	+	a	1	C	41	41
BY4741aux_1_C	Ral 437	54	110	0.490909	0.92	-	+	a	1	C	41	41
Tetrad1_C	Ral 437	56	110	0.509091	0.92	+	+	a	1	C	41T	1
BY4741aux_1_B	Ral 437	54	116	0.465517	0.97	-	+	a	1	B	41	41
Tetrad1_B	Ral 437	61	116	0.525862	0.97	-	+	alpha	1	B	41T	1
Tetrad1_D	Ral 437	49	106	0.462264	0.88	+	-	a	1	D	41T	1
BY4741aux_1_D	Ral 437	47	106	0.443396	0.88	-	+	a	1	D	41	41
BY4741aux_1_D	Ral 437	35	108	0.324074	0.9	-	+	a	1	D	41	41
Tetrad1_D	Ral 437	73	108	0.675926	0.9	+	-	a	1	D	41T	1
BY4742aux_1_A	Ral 437	33	106	0.311321	0.82	+	-	alpha	1	A	42	42
BY4742aux_1_A	Ral 437	34	66	0.515152	0.81	+	-	alpha	1	A	42	42
BY4742aux_1_A	Ral 437	27	93	0.290323	0.74	+	-	alpha	1	A	42	42
BY4742aux_1_B	Ral 437	19	109	0.174312	0.78	+	-	alpha	1	B	42	42
BY4742aux_1_B	Ral 437	26	87	0.298851	0.7	+	-	alpha	1	B	42	42
BY4742aux_1_B	Ral 437	20	94	0.212766	0.72	+	-	alpha	1	B	42	42
BY4742aux_1_C	Ral 437	25	116	0.215517	0.89	+	-	alpha	1	C	42	42
BY4742aux_1_C	Ral 437	36	71	0.507042	0.55	+	+	alpha	1	C	42	42
BY4742aux_1_C	Ral 437	36	78	0.461538	0.62	+	+	alpha	1	C	42	42
BY4742aux_1_D	Ral 437	25	117	0.213675	0.89	+	-	alpha	1	D	42	42
BY4742aux_1_D	Ral 437	36	88	0.409091	0.69	+	-	alpha	1	D	42	42
BY4742aux_1_D	Ral 437	32	84	0.380952	0.69	+	-	alpha	1	D	42	42
Tetrad1_A	Ral 437	73	106	0.688679	0.82	-	-	alpha	1	A	42T	1
Tetrad1_A	Ral 437	32	66	0.484848	0.81	-	-	alpha	1	A	42T	1
Tetrad1_A	Ral 437	66	93	0.709677	0.74	-	-	alpha	1	A	42T	1
Tetrad1_B	Ral 437	90	109	0.825688	0.78	-	+	alpha	1	B	42T	1
Tetrad1_B	Ral 437	61	87	0.701149	0.7	-	+	alpha	1	B	42T	1
Tetrad1_B	Ral 437	74	94	0.787234	0.72	-	+	alpha	1	B	42T	1
Tetrad1_C	Ral 437	91	116	0.784483	0.89	+	+	a	1	C	42T	1
Tetrad1_C	Ral 437	35	71	0.492958	0.55	+	-	alpha	1	C	42T	1
Tetrad1_C	Ral 437	42	78	0.538462	0.62	+	-	alpha	1	C	42T	1
Tetrad1_D	Ral 437	92	117	0.786325	0.89	+	-	a	1	D	42T	1
Tetrad1_D	Ral 437	52	88	0.590909	0.69	+	-	a	1	D	42T	1
Tetrad1_D	Ral 437	52	84	0.619048	0.69	+	-	a	1	D	42T	1
Tetrad18_B	Ral 437	96	113	0.849558	0.94	-	-	alpha	18	B	42T	1
BY4742aux_18_B	Ral 437	17	113	0.150442	0.94	+	-	alpha	18	B	42	42
BY4741aux	Ral 437	46	72	0.64	0.72	-	+	a	0	N	41	41
BY4742aux	Ral 437	26	72	0.36	0.72	+	-	alpha	0	N	42	42
BY4741aux	Ral 437	48	85	0.56	0.77	-	+	a	0	N	41	41
BY4742aux	Ral 437	37	85	0.44	0.77	+	-	alpha	0	N	42	42
BY4741aux	Ral 437	82	116	0.71	0.8	-	+	a	0	N	41	41
BY4742aux	Ral 437	34	116	0.29	0.8	+	-	alpha	0	N	42	42
BY4741aux	Ral 437	114	154	0.74	0.85	-	+	a	0	N	41	41
BY4742aux	Ral 437	40	154	0.26	0.85	+	-	alpha	0	N	42	42
BY4741aux	Ral 437	75	99	0.76	0.94	-	+	a	0	N	41	41
BY4742aux	Ral 437	24	99	0.23	0.94	+	-	alpha	0	N	42	42
BY4741aux	Ral 437	66	96	0.69	0.96	-	+	a	0	N	41	41
BY4742aux	Ral 437	30	96	0.31	0.96	+	-	alpha	0	N	42	42
BY4741aux	Ral 437	57	93	0.61	1	-	+	a	0	N	41	41
BY4741aux	Ral 437	67	98	0.69	1	-	+	a	0	N	41	42
BY4742aux	Ral 437	36	93	0.39	1	+	-	alpha	0	N	42	41
BY4742aux	Ral 437	31	98	0.31	1	+	-	alpha	0	N	42	42
BY4742aux	Ral 437	46	126	0.37	1.01	+	-	alpha	0	N	42	42
BY4741aux	Ral 437	80	126	0.63	1.05	-	+	a	0	N	41	41
BY4741aux	Ral 437	87	112	0.78	1.17	-	+	a	0	N	41	41
BY4742aux	Ral 437	25	112	0.22	1.17	+	-	alpha	0	N	42	42
BY4741aux	Ral 437	81	116	0.7	1.1	-	+	a	0	N	41	41
BY4742aux	Ral 437	35	116	0.3	1.1	+	-	alpha	0	N	42	42
BY4741aux	Ral 437	93	134	0.69	1.02	-	+	a	0	N	41	41
BY4742aux	Ral 437	41	134	0.31	1.02	+	-	alpha	0	N	42	42
BY4741aux	Ral 437	77	125	0.62	1.02	-	+	a	0	N	41	41
BY4742aux	Ral 437	48	125	0.38	1.02	+	-	alpha	0	N	42	42
BY4741aux	Ral 437	139	152	0.91	1.03	-	+	a	0	N	41	41
BY4742aux	Ral 437	13	152	0.09	1.03	+	-	alpha	0	N	42	42
BY4741aux	Ral 437	81	153	0.53	1.09	-	+	a	0	N	41	41
BY4742aux	Ral 437	72	153	0.47	1.09	+	-	alpha	0	N	42	42

## Sheet: 3day_trials
Date Counted	Trial	Media	Yeast	Fly Line	1 day old date(of youngest)	# of flies	Female	Male	Total	Total Caught	Percentage Caught	Percetage Female	Percentage Male	Percentage Flies Trapped	Trap Orientation	Near Light
2013-10-08	1	5%Glu YPD	BY4741aux_3day	Ral 437	2013-09-30	120	32	34	66	112	0.589286	0.484848	0.515152	0.933333	1	BY4742aux
2013-10-08	1	5%Glu YPD	BY4741aux_3day	Ral 437	2013-09-30	120	10	8	18	112	0.160714	0.555556	0.444444	0.933333	1	BY4742aux
2013-10-08	1	5%Glu YPD	BY4742aux_3day	Ral 437	2013-09-30	120	7	7	14	112	0.125	0.5	0.5	0.933333	1	BY4742aux
2013-10-08	1	5%Glu YPD	BY4742aux_3day	Ral 437	2013-09-30	120	7	7	14	112	0.125	0.5	0.5	0.933333	1	BY4742aux
2013-10-08	2	5%Glu YPD	BY4741aux_3day	Ral 437	2013-10-01	120	16	20	36	118	0.305085	0.444444	0.555556	0.983333	1	BY4741aux
2013-10-08	2	5%Glu YPD	BY4741aux_3day	Ral 437	2013-10-01	120	19	28	47	118	0.398305	0.404255	0.595745	0.983333	1	BY4741aux
2013-10-08	2	5%Glu YPD	BY4742aux_3day	Ral 437	2013-10-01	120	5	6	11	118	0.0932203	0.454545	0.545455	0.983333	1	BY4741aux
2013-10-08	2	5%Glu YPD	BY4742aux_3day	Ral 437	2013-10-01	120	14	10	24	118	0.20339	0.583333	0.416667	0.983333	1	BY4741aux
2013-10-15	1	5%Glu YPD	BY4741aux_3day	Ral 437	2013-10-07	120	25	20	45	116	0.387931	0.555556	0.444444	0.966667	1	BY4741aux
2013-10-15	1	5%Glu YPD	BY4741aux_3day	Ral 437	2013-10-07	120	0	0	0	116	0	#DIV/0!	#DIV/0!	0.966667	1	BY4741aux
2013-10-15	1	5%Glu YPD	BY4742aux_3day	Ral 437	2013-10-07	120	39	21	60	116	0.517241	0.65	0.35	0.966667	1	BY4741aux
2013-10-15	1	5%Glu YPD	BY4742aux_3day	Ral 437	2013-10-07	120	7	4	11	116	0.0948276	0.636364	0.363636	0.966667	1	BY4741aux
2013-10-15	2	5%Glu YPD	BY4741aux_3day	Ral 437	2013-10-07	120	20	10	30	124	0.241935	0.666667	0.333333	1.03333	1	BY4742aux
2013-10-15	2	5%Glu YPD	BY4741aux_3day	Ral 437	2013-10-07	120	20	20	40	124	0.322581	0.5	0.5	1.03333	1	BY4742aux
2013-10-15	2	5%Glu YPD	BY4742aux_3day	Ral 437	2013-10-07	120	20	12	32	124	0.258065	0.625	0.375	1.03333	1	BY4742aux
2013-10-15	2	5%Glu YPD	BY4742aux_3day	Ral 437	2013-10-07	120	12	10	22	124	0.177419	0.545455	0.454545	1.03333	1	BY4742aux
2013-11-01	1	5%Glu YPD	BY4741aux_3day	Ral 437	2013-10-28	120	15	10	25	120	0.208333	0.6	0.4	1	2	BY4742aux
2013-11-01	1	5%Glu YPD	BY4741aux_3day	Ral 437	2013-10-28	120	30	28	58	120	0.483333	0.517241	0.482759	1	2	BY4742aux
2013-11-01	1	5%Glu YPD	BY4742aux_3day	Ral 437	2013-10-28	120	11	8	19	120	0.158333	0.578947	0.421053	1	2	BY4742aux
2013-11-01	1	5%Glu YPD	BY4742aux_3day	Ral 437	2013-10-28	120	10	8	18	120	0.15	0.555556	0.444444	1	2	BY4742aux
2013-11-01	2	5%Glu YPD	BY4741aux_3day	Ral 437	2013-10-28	120	19	27	46	114	0.403509	0.413043	0.586957	0.95	2	BY4742aux
2013-11-01	2	5%Glu YPD	BY4741aux_3day	Ral 437	2013-10-28	120	6	26	32	114	0.280702	0.1875	0.8125	0.95	2	BY4742aux
2013-11-01	2	5%Glu YPD	BY4742aux_3day	Ral 437	2013-10-28	120	2	8	10	114	0.0877193	0.2	0.8	0.95	2	BY4742aux
2013-11-01	2	5%Glu YPD	BY4742aux_3day	Ral 437	2013-10-28	120	11	15	26	114	0.22807	0.423077	0.576923	0.95	2	BY4742aux
2013-11-05	1	5%Glu YPD	BY4741aux_3day	Ral 437	2013-10-29	120	6	16	22	119	0.184874	0.272727	0.727273	0.991667	1	BY4741aux
2013-11-05	1	5%Glu YPD	BY4741aux_3day	Ral 437	2013-10-29	120	30	46	76	119	0.638655	0.394737	0.605263	0.991667	1	BY4741aux
2013-11-05	1	5%Glu YPD	BY4742aux_3day	Ral 437	2013-10-29	120	5	2	7	119	0.0588235	0.714286	0.285714	0.991667	1	BY4741aux
2013-11-05	1	5%Glu YPD	BY4742aux_3day	Ral 437	2013-10-29	120	5	9	14	119	0.117647	0.357143	0.642857	0.991667	1	BY4741aux
2013-11-05	2	5%Glu YPD	BY4741aux_3day	Ral 437	2013-10-31	120	16	12	28	113	0.247788	0.571429	0.428571	0.941667	1	BY4742aux
2013-11-05	2	5%Glu YPD	BY4741aux_3day	Ral 437	2013-10-31	120	20	20	40	113	0.353982	0.5	0.5	0.941667	1	BY4742aux
2013-11-05	2	5%Glu YPD	BY4742aux_3day	Ral 437	2013-10-31	120	10	10	20	113	0.176991	0.5	0.5	0.941667	1	BY4742aux
2013-11-05	2	5%Glu YPD	BY4742aux_3day	Ral 437	2013-10-31	120	16	9	25	113	0.221239	0.64	0.36	0.941667	1	BY4742aux
2013-11-12	1	5%Glu YPD	BY4741aux_3day	Ral 437	2013-11-04	120	21	23	44	115	0.382609	0.477273	0.522727	0.958333	2	BY4741aux
2013-11-12	1	5%Glu YPD	BY4741aux_3day	Ral 437	2013-11-04	120	27	18	45	115	0.391304	0.6	0.4	0.958333	2	BY4741aux
2013-11-12	1	5%Glu YPD	BY4742aux_3day	Ral 437	2013-11-04	120	3	9	12	115	0.104348	0.25	0.75	0.958333	2	BY4741aux
2013-11-12	1	5%Glu YPD	BY4742aux_3day	Ral 437	2013-11-04	120	9	5	14	115	0.121739	0.642857	0.357143	0.958333	2	BY4741aux
2013-11-19	1	5%Glu YPD	BY4741aux_3day	Ral 437	2013-11-07	120	2	5	7	123	0.0569106	0.285714	0.714286	1.025	2	BY4742aux
2013-11-19	1	5%Glu YPD	BY4741aux_3day	Ral 437	2013-11-07	120	22	18	40	123	0.325203	0.55	0.45	1.025	2	BY4742aux
2013-11-19	1	5%Glu YPD	BY4742aux_3day	Ral 437	2013-11-07	120	11	7	18	123	0.146341	0.611111	0.388889	1.025	2	BY4742aux
2013-11-19	1	5%Glu YPD	BY4742aux_3day	Ral 437	2013-11-07	120	29	29	58	123	0.471545	0.5	0.5	1.025	2	BY4742aux
2013-11-19	2	5%Glu YPD	BY4741aux_3day	Ral 437	2013-11-07	120	18	17	35	120	0.291667	0.514286	0.485714	1	2	BY4742aux
2013-11-19	2	5%Glu YPD	BY4741aux_3day	Ral 437	2013-11-07	120	22	17	39	120	0.325	0.564103	0.435897	1	2	BY4742aux
2013-11-19	2	5%Glu YPD	BY4742aux_3day	Ral 437	2013-11-07	120	15	15	30	120	0.25	0.5	0.5	1	2	BY4742aux
2013-11-19	2	5%Glu YPD	BY4742aux_3day	Ral 437	2013-11-07	120	9	7	16	120	0.133333	0.5625	0.4375	1	2	BY4742aux
2014-01-28	1	5%Glu YPD	BY4742aux_3day	Ral 437	2014-01-17	120	1	3	4	104	0.0384615	0.25	0.75	0.866667	2	BY4741aux
2014-01-28	1	5%Glu YPD	BY4742aux_3day	Ral 437	2014-01-17	120	5	4	9	104	0.0865385	0.555556	0.444444	0.866667	2	BY4741aux
2014-01-28	1	5%Glu YPD	BY4741aux_3day	Ral 437	2014-01-17	120	34	23	57	104	0.548077	0.596491	0.403509	0.866667	2	BY4741aux
2014-01-28	1	5%Glu YPD	BY4741aux_3day	Ral 437	2014-01-17	120	24	18	42	104	0.403846	0.571429	0.428571	0.866667	2	BY4741aux
2014-01-28	2	5%Glu YPD	BY4742aux_3day	Ral 437	2014-01-17	120	3	3	6	125	0.048	0.5	0.5	1.04167	2	BY4741aux
2014-01-28	2	5%Glu YPD	BY4742aux_3day	Ral 437	2014-01-17	120	3	11	14	125	0.112	0.214286	0.785714	1.04167	2	BY4741aux
2014-01-28	2	5%Glu YPD	BY4741aux_3day	Ral 437	2014-01-17	120	22	12	34	125	0.272	0.647059	0.352941	1.04167	2	BY4741aux
2014-01-28	2	5%Glu YPD	BY4741aux_3day	Ral 437	2014-01-17	120	40	31	71	125	0.568	0.56338	0.43662	1.04167	2	BY4741aux
2014-02-06	1	5%Glu YPD	BY4741aux_1day	Ral 437	2014-01-24	120	23	17	40	123	0.325203	0.575	0.425	1.025	1	BY4741aux
2014-02-06	1	5%Glu YPD	BY4741aux_1day	Ral 437	2014-01-24	120	38	26	64	123	0.520325	0.59375	0.40625	1.025	1	BY4741aux
2014-02-06	1	5%Glu YPD	BY4742aux_2day	Ral 437	2014-01-24	120	4	3	7	123	0.0569106	0.571429	0.428571	1.025	1	BY4741aux
2014-02-06	1	5%Glu YPD	BY4742aux_2day	Ral 437	2014-01-24	120	8	4	12	123	0.097561	0.666667	0.333333	1.025	1	BY4741aux
2014-02-14	1	5%Glu YPD	BY4742aux_2day	Ral 437	2014-02-05	120	6	3	9	117	0.0769231	0.666667	0.333333	0.975	2	BY4741aux
2014-02-14	1	5%Glu YPD	BY4742aux_2day	Ral 437	2014-02-05	120	4	3	7	117	0.0598291	0.571429	0.428571	0.975	2	BY4741aux
2014-02-14	1	5%Glu YPD	BY4741aux_1day	Ral 437	2014-02-05	120	29	26	55	117	0.470085	0.527273	0.472727	0.975	2	BY4741aux
2014-02-14	1	5%Glu YPD	BY4741aux_1day	Ral 437	2014-02-05	120	19	27	46	117	0.393162	0.413043	0.586957	0.975	2	BY4741aux
2014-02-14	2	5%Glu YPD	BY4741aux_1day	Ral 437	2014-02-05	120	20	23	43	116	0.37069	0.465116	0.534884	0.966667	2	BY4742aux
2014-02-14	2	5%Glu YPD	BY4741aux_1day	Ral 437	2014-02-05	120	36	30	66	116	0.568966	0.545455	0.454545	0.966667	2	BY4742aux
2014-02-14	2	5%Glu YPD	BY4742aux_2day	Ral 437	2014-02-05	120	6	2	8	116	0.0689655	0.75	0.25	0.966667	2	BY4742aux
2014-02-14	2	5%Glu YPD	BY4742aux_2day	Ral 437	2014-02-05	120	4	6	10	116	0.0862069	0.4	0.6	0.966667	2	BY4742aux
2014-02-14	3	5%Glu YPD	BY4741aux_2day	Ral 437	2014-02-05	120	19	18	37	118	0.313559	0.513514	0.486486	0.983333	1	BY4741aux_2day
2014-02-14	3	5%Glu YPD	BY4741aux_2day	Ral 437	2014-02-05	120	15	16	31	118	0.262712	0.483871	0.516129	0.983333	1	BY4741aux_2day
2014-02-14	3	5%Glu YPD	BY4741aux_1day	Ral 437	2014-02-05	120	12	17	29	118	0.245763	0.413793	0.586207	0.983333	1	BY4741aux_2day
2014-02-14	3	5%Glu YPD	BY4741aux_1day	Ral 437	2014-02-05	120	13	8	21	118	0.177966	0.619048	0.380952	0.983333	1	BY4741aux_2day
2014-02-14	4	5%Glu YPD	BY4741aux_1day	Ral 437	2014-02-05	120	10	12	22	117	0.188034	0.454545	0.545455	0.975	1	BY4741aux_1day
2014-02-14	4	5%Glu YPD	BY4741aux_1day	Ral 437	2014-02-05	120	30	27	57	117	0.487179	0.526316	0.473684	0.975	1	BY4741aux_1day
2014-02-14	4	5%Glu YPD	BY4741aux_2day	Ral 437	2014-02-05	120	8	7	15	117	0.128205	0.533333	0.466667	0.975	1	BY4741aux_1day
2014-02-14	4	5%Glu YPD	BY4741aux_2day	Ral 437	2014-02-05	120	12	11	23	117	0.196581	0.521739	0.478261	0.975	1	BY4741aux_1day
2014-02-21	1	5%Glu YPD	BY4741aux_2day	Ral 437	2014-02-11	120	12	5	17	115	0.147826	0.705882	0.294118	0.958333	2	BY4741aux_1day
2014-02-21	1	5%Glu YPD	BY4741aux_2day	Ral 437	2014-02-11	120	13	3	16	115	0.13913	0.8125	0.1875	0.958333	2	BY4741aux_1day
2014-02-21	1	5%Glu YPD	BY4741aux_1day	Ral 437	2014-02-11	120	22	26	48	115	0.417391	0.458333	0.541667	0.958333	2	BY4741aux_1day
2014-02-21	1	5%Glu YPD	BY4741aux_1day	Ral 437	2014-02-11	120	20	15	35	115	0.304348	0.571429	0.428571	0.958333	2	BY4741aux_1day
2014-02-21	2	5%Glu YPD	BY4741aux_1day	Ral 437	2014-02-11	120	12	15	27	124	0.217742	0.444444	0.555556	1.03333	2	BY4741aux_2day
2014-02-21	2	5%Glu YPD	BY4741aux_1day	Ral 437	2014-02-11	120	27	19	46	124	0.370968	0.586957	0.413043	1.03333	2	BY4741aux_2day
2014-02-21	2	5%Glu YPD	BY4741aux_2day	Ral 437	2014-02-11	120	17	12	29	124	0.233871	0.586207	0.413793	1.03333	2	BY4741aux_2day
2014-02-21	2	5%Glu YPD	BY4741aux_2day	Ral 437	2014-02-11	120	12	10	22	124	0.177419	0.545455	0.454545	1.03333	2	BY4741aux_2day
2014-01-31	1	5%Glu YPD	BY4741aux_1day	Ral 437	2014-01-21	120	19	9	28	100	0.28	0.678571	0.321429	0.833333	1	BY4741aux_1day
2014-01-31	1	5%Glu YPD	BY4741aux_1day	Ral 437	2014-01-21	120	22	22	44	100	0.44	0.5	0.5	0.833333	1	BY4741aux_1day
2014-01-31	1	5%Glu YPD	BY4741aux_3day	Ral 437	2014-01-21	120	7	2	9	100	0.09	0.777778	0.222222	0.833333	1	BY4741aux_1day
2014-01-31	1	5%Glu YPD	BY4741aux_3day	Ral 437	2014-01-21	120	15	4	19	100	0.19	0.789474	0.210526	0.833333	1	BY4741aux_1day
2014-01-31	2	5%Glu YPD	BY4741aux_3day	Ral 437	2014-01-22	120	16	4	20	121	0.165289	0.8	0.2	1.00833	1	BY4741aux_3day
2014-01-31	2	5%Glu YPD	BY4741aux_3day	Ral 437	2014-01-22	120	9	8	17	121	0.140496	0.529412	0.470588	1.00833	1	BY4741aux_3day
2014-01-31	2	5%Glu YPD	BY4741aux_1day	Ral 437	2014-01-22	120	19	23	42	121	0.347107	0.452381	0.547619	1.00833	1	BY4741aux_3day
2014-01-31	2	5%Glu YPD	BY4741aux_1day	Ral 437	2014-01-22	120	23	19	42	121	0.347107	0.547619	0.452381	1.00833	1	BY4741aux_3day
2014-01-31	3	5%Glu YPD	BY4742aux_1day	Ral 437	2014-01-21	120	27	23	50	110	0.454545	0.54	0.46	0.916667	1	BY4742aux_1day
2014-01-31	3	5%Glu YPD	BY4742aux_1day	Ral 437	2014-01-21	120	23	15	38	110	0.345455	0.605263	0.394737	0.916667	1	BY4742aux_1day
2014-01-31	3	5%Glu YPD	BY4742aux_3day	Ral 437	2014-01-21	120	5	3	8	110	0.0727273	0.625	0.375	0.916667	1	BY4742aux_1day
2014-01-31	3	5%Glu YPD	BY4742aux_3day	Ral 437	2014-01-21	120	5	9	14	110	0.127273	0.357143	0.642857	0.916667	1	BY4742aux_1day
2014-01-31	4	5%Glu YPD	BY4742aux_3day	Ral 437	2014-01-21	120	0	3	3	97	0.0309278	0	1	0.808333	1	BY4742aux_3day
2014-01-31	4	5%Glu YPD	BY4742aux_3day	Ral 437	2014-01-21	120	3	4	7	97	0.0721649	0.428571	0.571429	0.808333	1	BY4742aux_3day
2014-01-31	4	5%Glu YPD	BY4742aux_1day	Ral 437	2014-01-21	120	18	16	34	97	0.350515	0.529412	0.470588	0.808333	1	BY4742aux_3day
2014-01-31	4	5%Glu YPD	BY4742aux_1day	Ral 437	2014-01-21	120	25	28	53	97	0.546392	0.471698	0.528302	0.808333	1	BY4742aux_3day
2014-02-21	3	5%Glu YPD	BY4741aux_7h	Ral 437	2014-02-11	120	26	20	46	113	0.40708	0.565217	0.434783	0.941667	1	BY4741aux_7h
2014-02-21	3	5%Glu YPD	BY4741aux_7h	Ral 437	2014-02-11	120	22	20	42	113	0.371681	0.52381	0.47619	0.941667	1	BY4741aux_7h
2014-02-21	3	5%Glu YPD	BY4742aux_7h	Ral 437	2014-02-11	120	8	3	11	113	0.0973451	0.727273	0.272727	0.941667	1	BY4741aux_7h
2014-02-21	3	5%Glu YPD	BY4742aux_7h	Ral 437	2014-02-11	120	10	4	14	113	0.123894	0.714286	0.285714	0.941667	1	BY4741aux_7h
2014-02-21	4	5%Glu YPD	BY4741aux_7h	Ral 437	2014-02-12	120	7	6	13	115	0.113043	0.538462	0.461538	0.958333	1	BY4741aux_7h
2014-02-21	4	5%Glu YPD	BY4741aux_7h	Ral 437	2014-02-12	120	13	9	22	115	0.191304	0.590909	0.409091	0.958333	1	BY4741aux_7h
2014-02-21	4	5%Glu YPD	BY4741aux_1day	Ral 437	2014-02-12	120	16	16	32	115	0.278261	0.5	0.5	0.958333	1	BY4741aux_7h
2014-02-21	4	5%Glu YPD	BY4741aux_1day	Ral 437	2014-02-12	120	26	22	48	115	0.417391	0.541667	0.458333	0.958333	1	BY4741aux_7h
2014-02-21	5	5%Glu YPD	BY4741aux_1day	Ral 437	2014-02-12	120	3	2	5	111	0.045045	0.6	0.4	0.925	2	BY4741aux_1day
2014-02-21	5	5%Glu YPD	BY4741aux_1day	Ral 437	2014-02-12	120	33	29	62	111	0.558559	0.532258	0.467742	0.925	2	BY4741aux_1day
2014-02-21	5	5%Glu YPD	BY4741aux_7h	Ral 437	2014-02-12	120	8	10	18	111	0.162162	0.444444	0.555556	0.925	2	BY4741aux_1day
2014-02-21	5	5%Glu YPD	BY4741aux_7h	Ral 437	2014-02-12	120	13	13	26	111	0.234234	0.5	0.5	0.925	2	BY4741aux_1day
2014-03-25	1	5%Glu YPD	BY4741aux_3day	Ral 437	2014-03-17	120	17	19	36	112	0.321429	0.472222	0.527778	0.933333	2	BY4742aux_1day
2014-03-25	1	5%Glu YPD	BY4741aux_3day	Ral 437	2014-03-17	120	12	14	26	112	0.232143	0.461538	0.538462	0.933333	2	BY4742aux_1day
2014-03-25	1	5%Glu YPD	BY4742aux_1day	Ral 437	2014-03-17	120	25	20	45	112	0.401786	0.555556	0.444444	0.933333	2	BY4742aux_1day
2014-03-25	1	5%Glu YPD	BY4742aux_1day	Ral 437	2014-03-17	120	12	3	15	112	0.133929	0.8	0.2	0.933333	2	BY4742aux_1day
2014-03-25	2	5%Glu YPD	BY4742aux_1day	Ral 437	2014-03-17	120	6	12	18	118	0.152542	0.333333	0.666667	0.983333	2	BY4741aux_3day
2014-03-25	2	5%Glu YPD	BY4742aux_1day	Ral 437	2014-03-17	120	9	13	22	118	0.186441	0.409091	0.590909	0.983333	2	BY4741aux_3day
2014-03-25	2	5%Glu YPD	BY4741aux_3day	Ral 437	2014-03-17	120	15	12	27	118	0.228814	0.555556	0.444444	0.983333	2	BY4741aux_3day
2014-03-25	2	5%Glu YPD	BY4741aux_3day	Ral 437	2014-03-17	120	30	21	51	118	0.432203	0.588235	0.411765	0.983333	2	BY4741aux_3day
2014-03-25	3	5%Glu YPD	BY4741aux_1day	Ral 437	2014-03-17	120	13	16	29	108	0.268519	0.448276	0.551724	0.9	2	BY4741aux_3day
2014-03-25	3	5%Glu YPD	BY4741aux_1day	Ral 437	2014-03-17	120	31	21	52	108	0.481481	0.596154	0.403846	0.9	2	BY4741aux_3day
2014-03-25	3	5%Glu YPD	BY4741aux_3day	Ral 437	2014-03-17	120	11	6	17	108	0.157407	0.647059	0.352941	0.9	2	BY4741aux_3day
2014-03-25	3	5%Glu YPD	BY4741aux_3day	Ral 437	2014-03-17	120	5	5	10	108	0.0925926	0.5	0.5	0.9	2	BY4741aux_3day
2014-06-20	1	5%Glu YPD	BY4741aux_3day	Ral 437	2014-06-12	120	12	5	17	108	0.157407	0.705882	0.294118	0.9	1	BY4741aux_3day
2014-06-20	1	5%Glu YPD	BY4741aux_3day	Ral 437	2014-06-12	120	21	18	39	108	0.361111	0.538462	0.461538	0.9	1	BY4741aux_3day
2014-06-20	1	5%Glu YPD	BY4742aux_1day	Ral 437	2014-06-12	120	21	15	36	108	0.333333	0.583333	0.416667	0.9	1	BY4741aux_3day
2014-06-20	1	5%Glu YPD	BY4742aux_1day	Ral 437	2014-06-12	120	14	12	26	108	0.240741	0.538462	0.461538	0.9	1	BY4741aux_3day
2014-06-20	2	5%Glu YPD	BY4741aux_3day	Ral 437	2014-06-11	120	29	17	46	108	0.425926	0.630435	0.369565	0.9	2	BY4742aux_1day
2014-06-20	2	5%Glu YPD	BY4741aux_3day	Ral 437	2014-06-11	120	13	18	31	108	0.287037	0.419355	0.580645	0.9	2	BY4742aux_1day
2014-06-20	2	5%Glu YPD	BY4742aux_1day	Ral 437	2014-06-11	120	10	15	25	108	0.231481	0.4	0.6	0.9	2	BY4742aux_1day
2014-06-20	2	5%Glu YPD	BY4742aux_1day	Ral 437	2014-06-11	120	4	2	6	108	0.0555556	0.666667	0.333333	0.9	2	BY4742aux_1day
2014-06-20	3	5%Glu YPD	BY4741aux_3day	Ral 437	2014-06-11	120	6	10	16	116	0.137931	0.375	0.625	0.966667	1	BY4741aux_3day
2014-06-20	3	5%Glu YPD	BY4741aux_3day	Ral 437	2014-06-11	120	6	13	19	116	0.163793	0.315789	0.684211	0.966667	1	BY4741aux_3day
2014-06-20	3	5%Glu YPD	BY4741aux_1day	Ral 437	2014-06-11	120	19	23	42	116	0.362069	0.452381	0.547619	0.966667	1	BY4741aux_3day
2014-06-20	3	5%Glu YPD	BY4741aux_1day	Ral 437	2014-06-11	120	15	24	39	116	0.336207	0.384615	0.615385	0.966667	1	BY4741aux_3day
2014-06-20	4	5%Glu YPD	BY4741aux_1day	Ral 437	2014-06-11	120	25	11	36	118	0.305085	0.694444	0.305556	0.983333	1	BY4741aux_1day
2014-06-20	4	5%Glu YPD	BY4741aux_1day	Ral 437	2014-06-11	120	25	26	51	118	0.432203	0.490196	0.509804	0.983333	1	BY4741aux_1day
2014-06-20	4	5%Glu YPD	BY4741aux_3day	Ral 437	2014-06-11	120	5	4	9	118	0.0762712	0.555556	0.444444	0.983333	1	BY4741aux_1day
2014-06-20	4	5%Glu YPD	BY4741aux_3day	Ral 437	2014-06-11	120	6	14	20	118	0.169492	0.3	0.7	0.983333	1	BY4741aux_1day
													#DIV/0!	#DIV/0!

[truncated: 8 more sheets: behavior_plots_timecourse_data., T73_trials, T73_trials_mat.csv, Rho_mutants, behavior_plots_rho_data.csv, Gene_KO, Gene_KO_mat.csv, Randoms]
